# Supplementary material
Source: publisher figshare collection journal article supplement (https://frontiersin.figshare.com/ndownloader/files/17852720)
Supplement: Supplementary file [file 17852720]

Figure S1\_1A

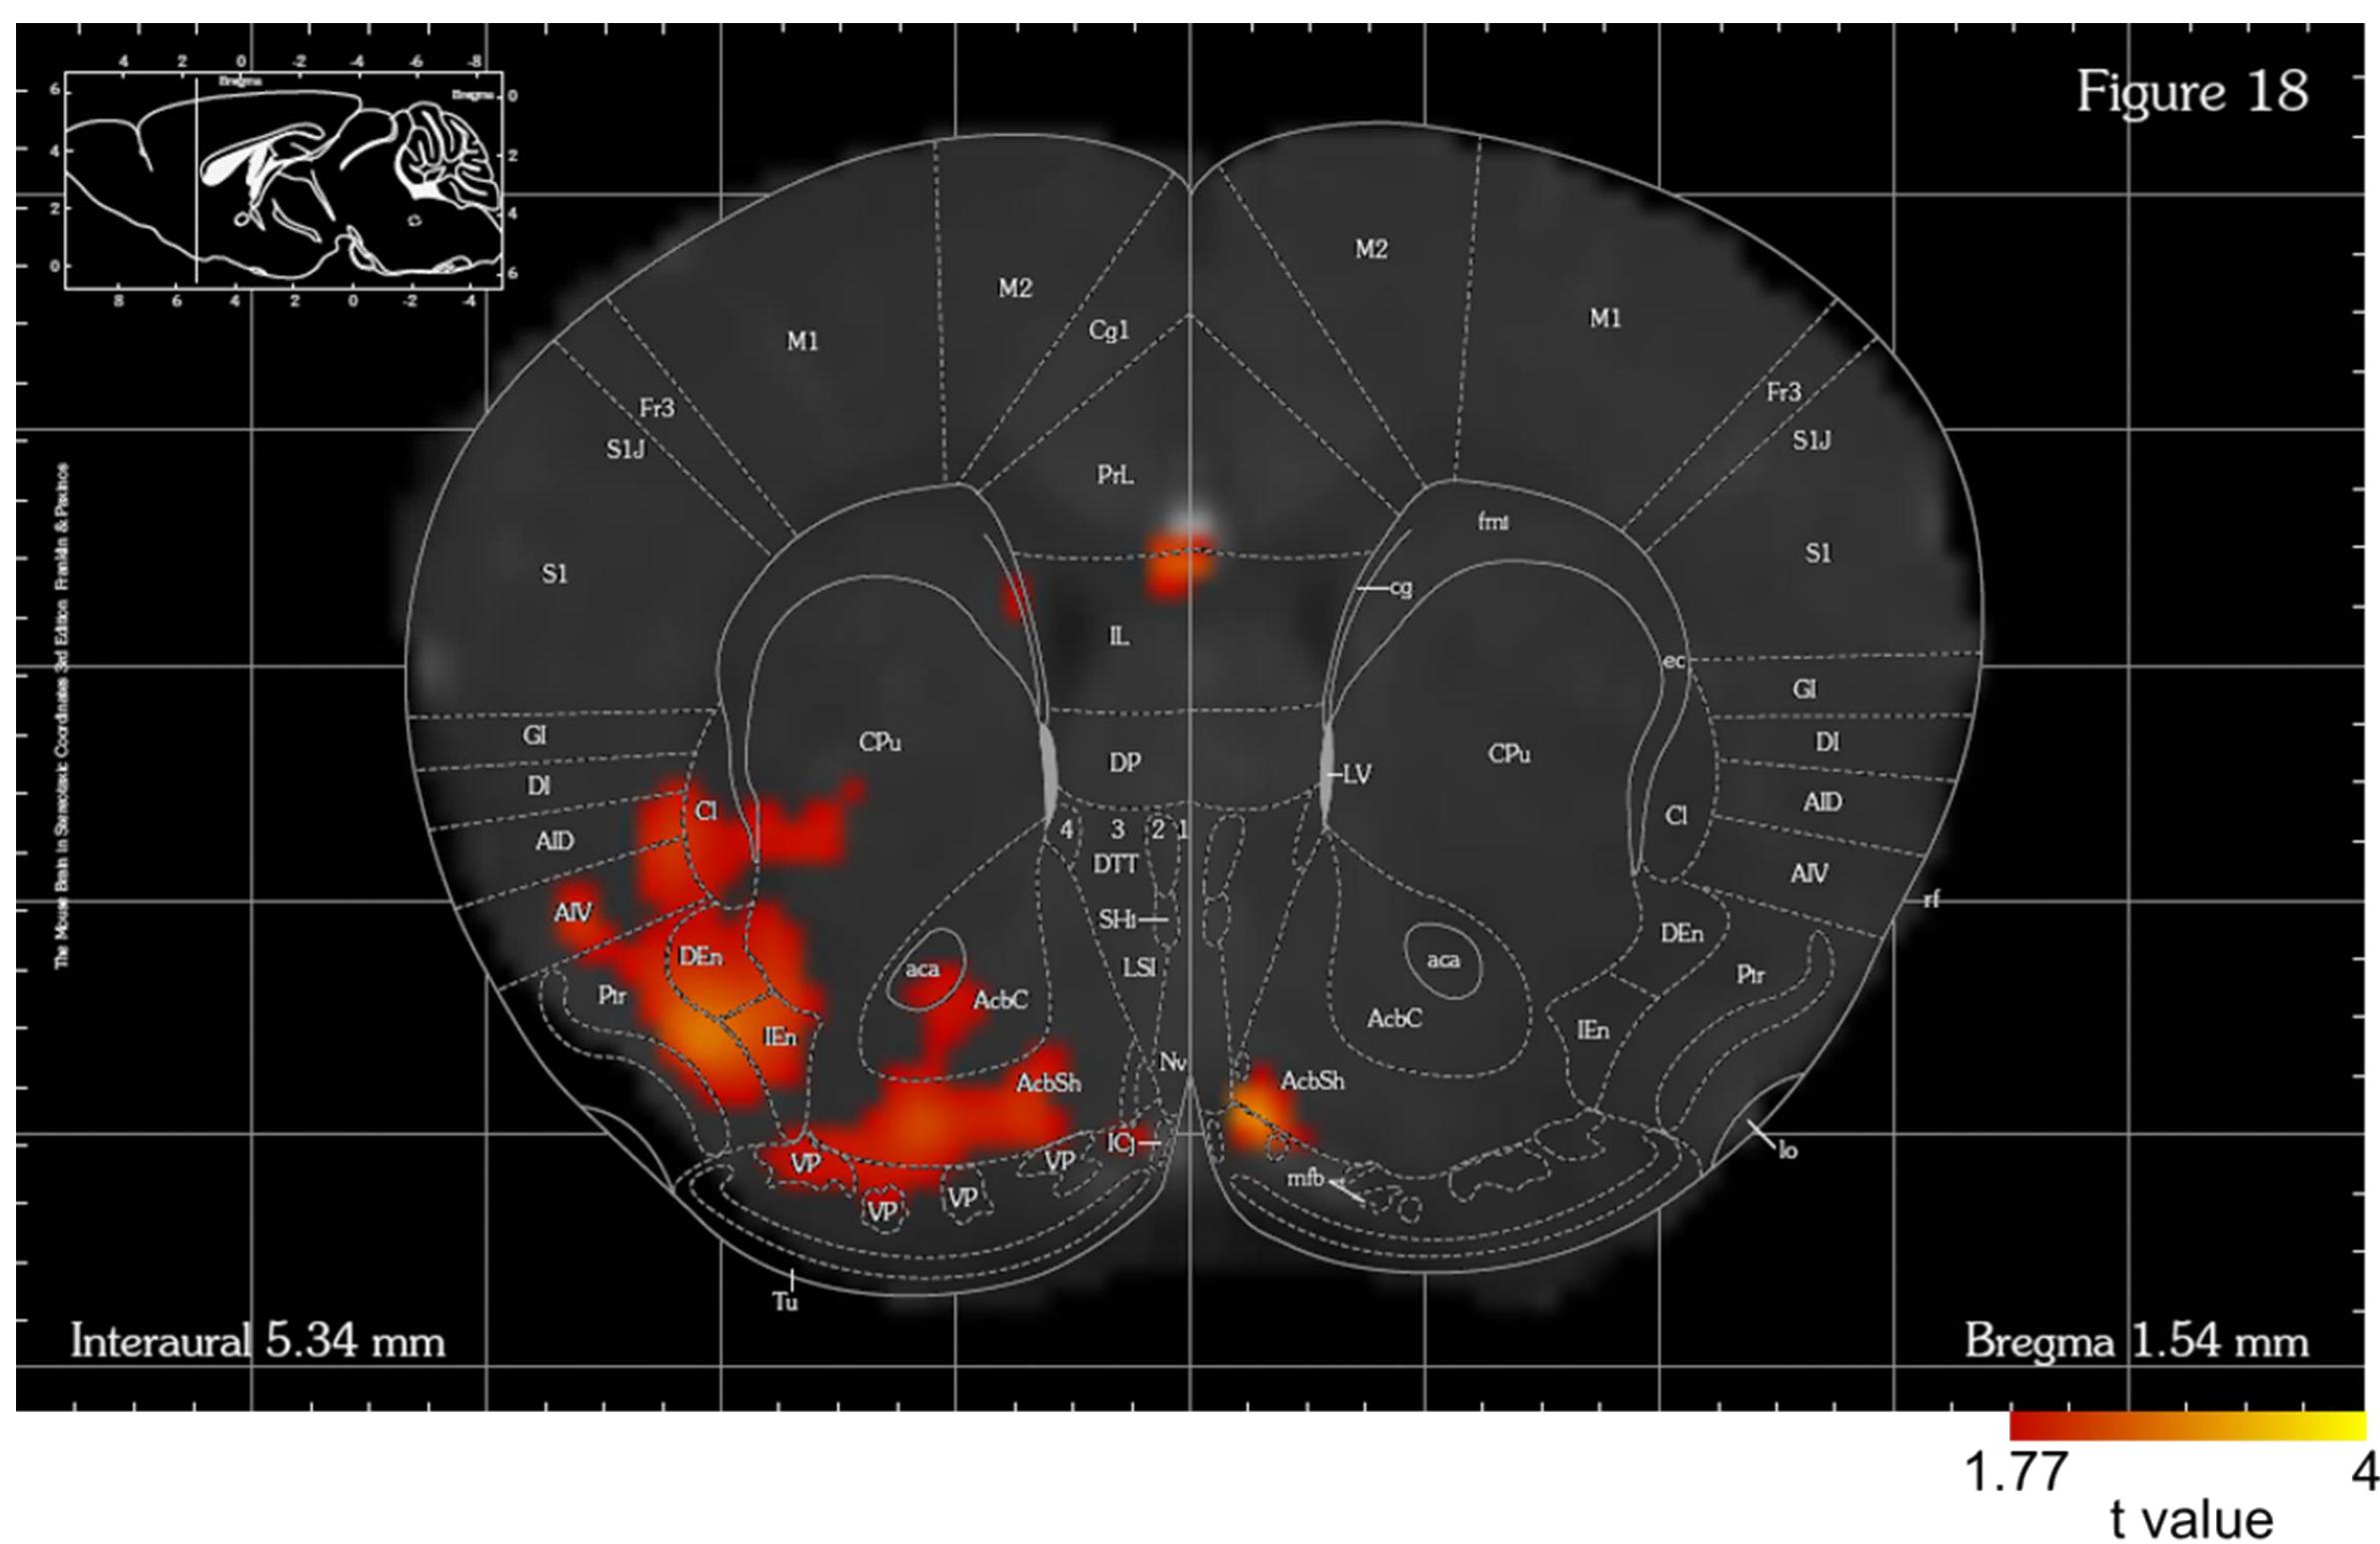

Figure S1\_1B

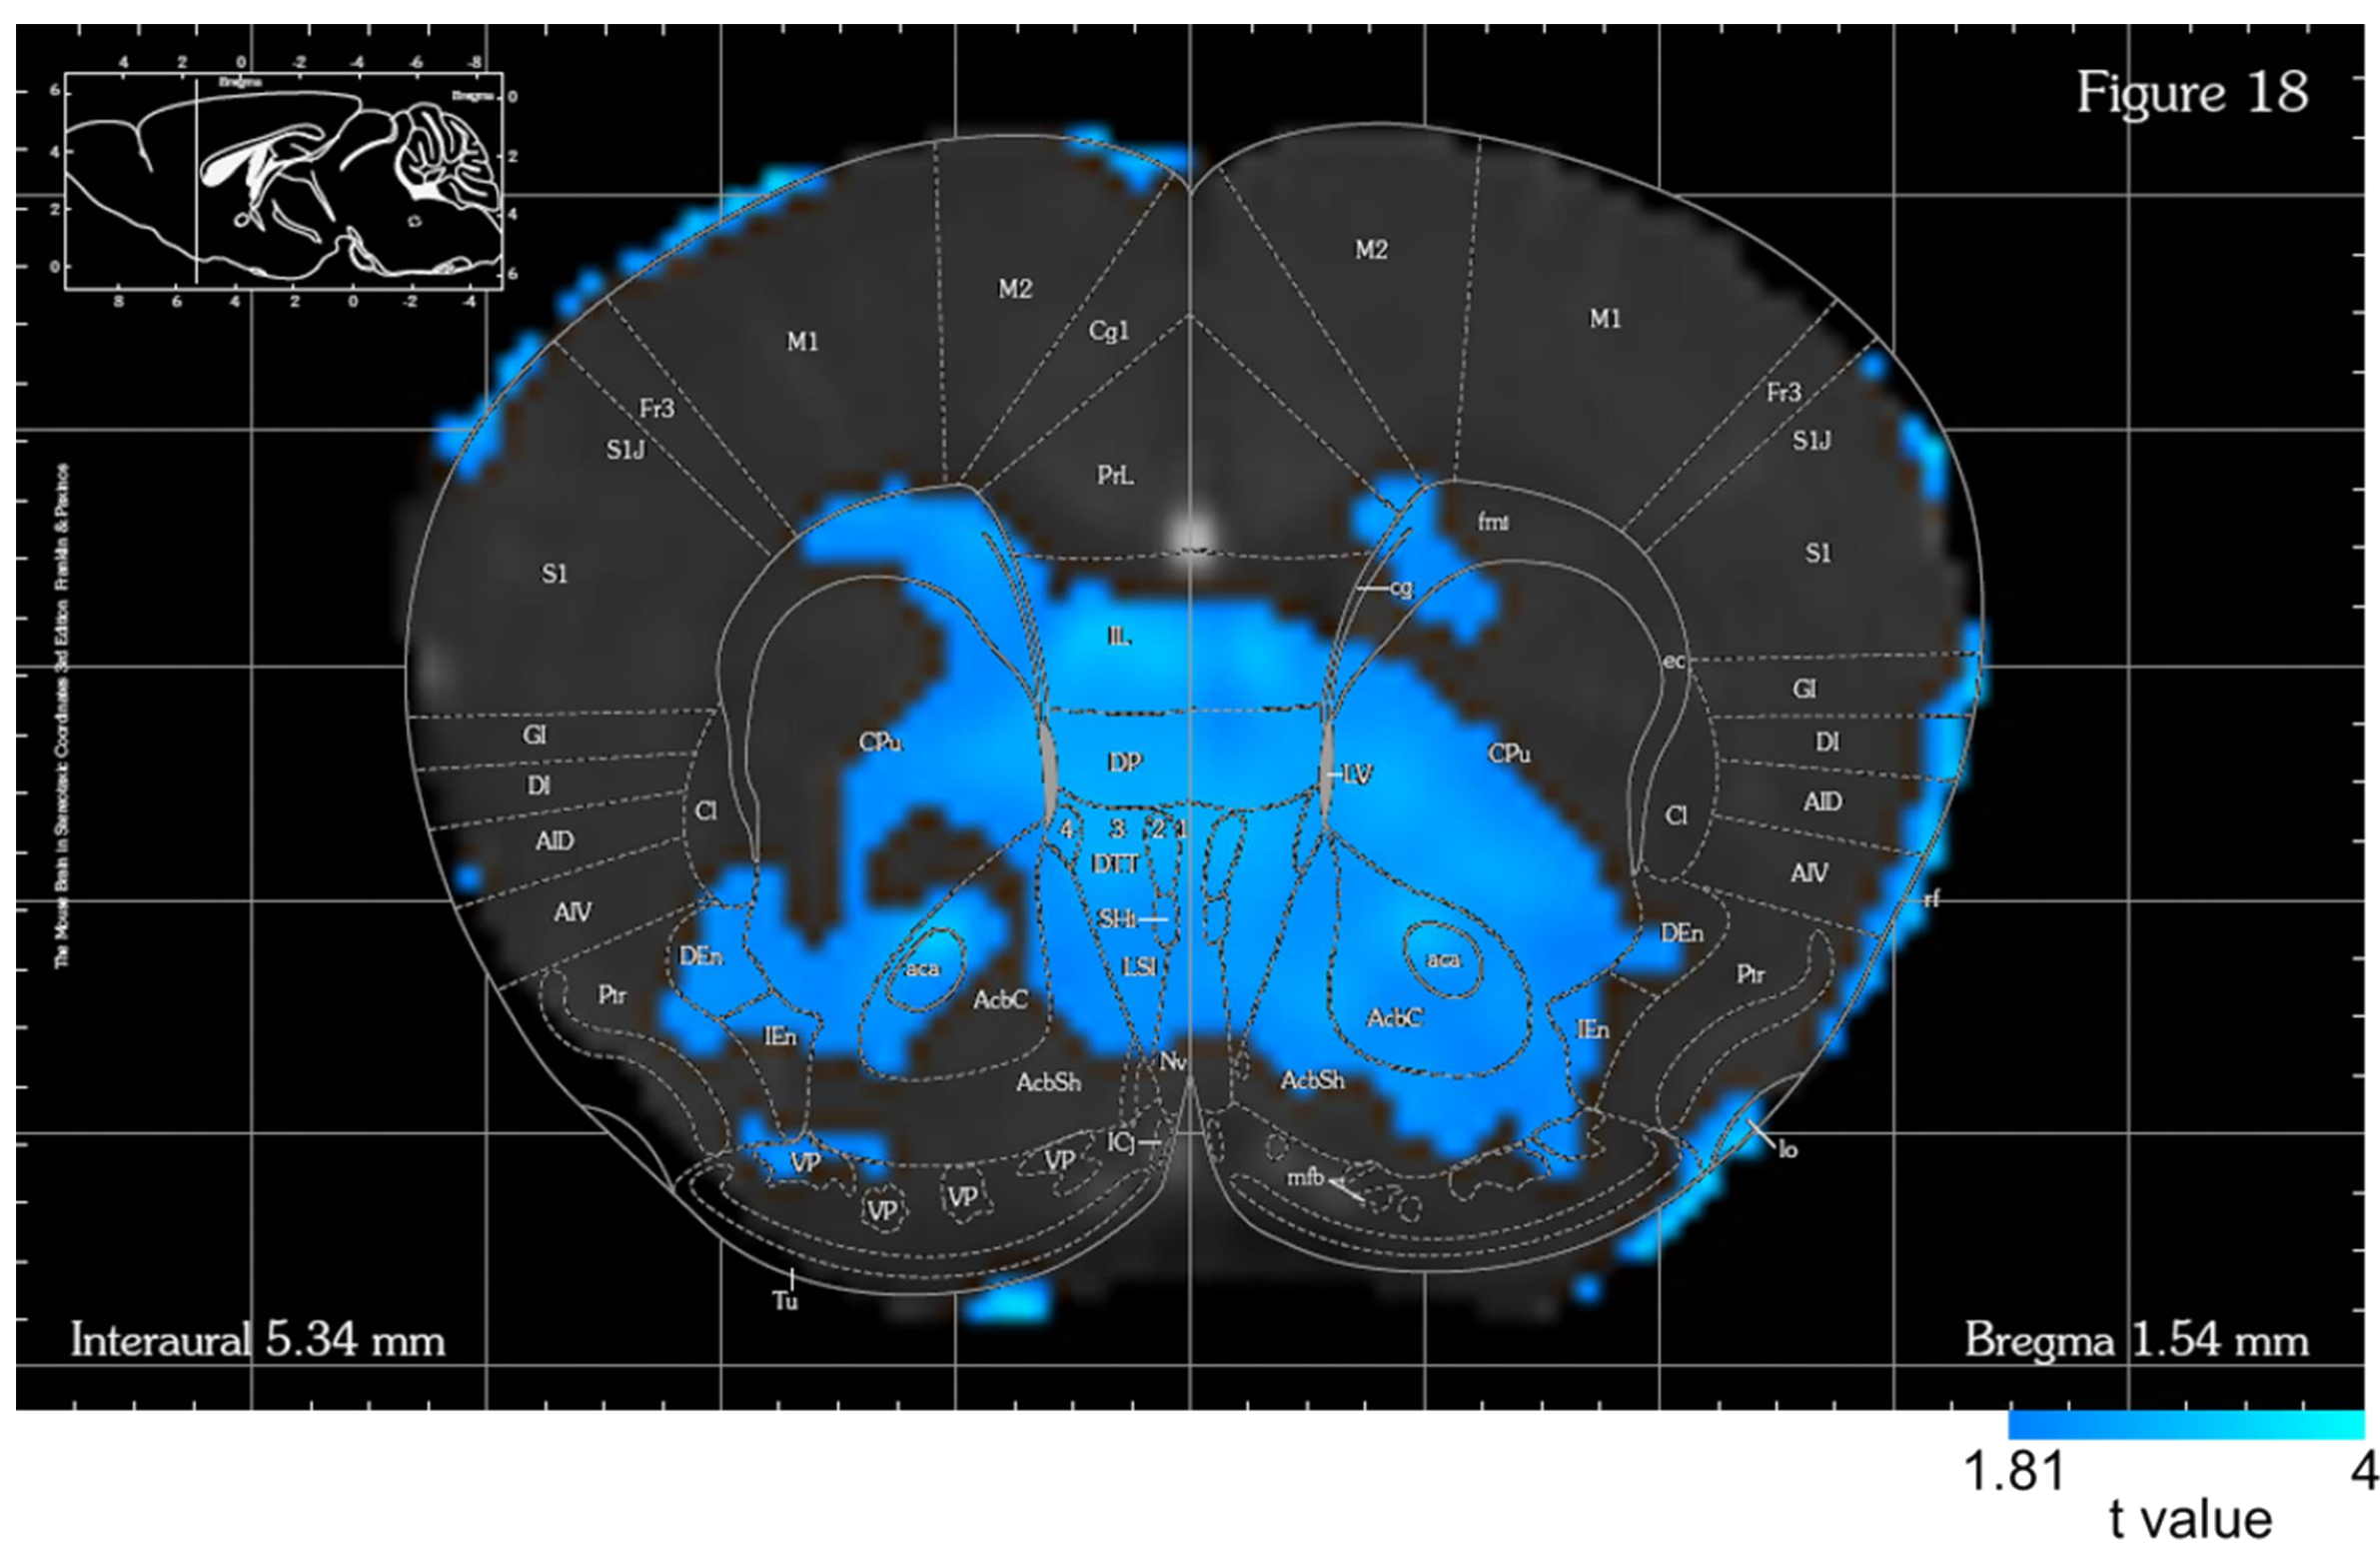



Figure S1\_2A

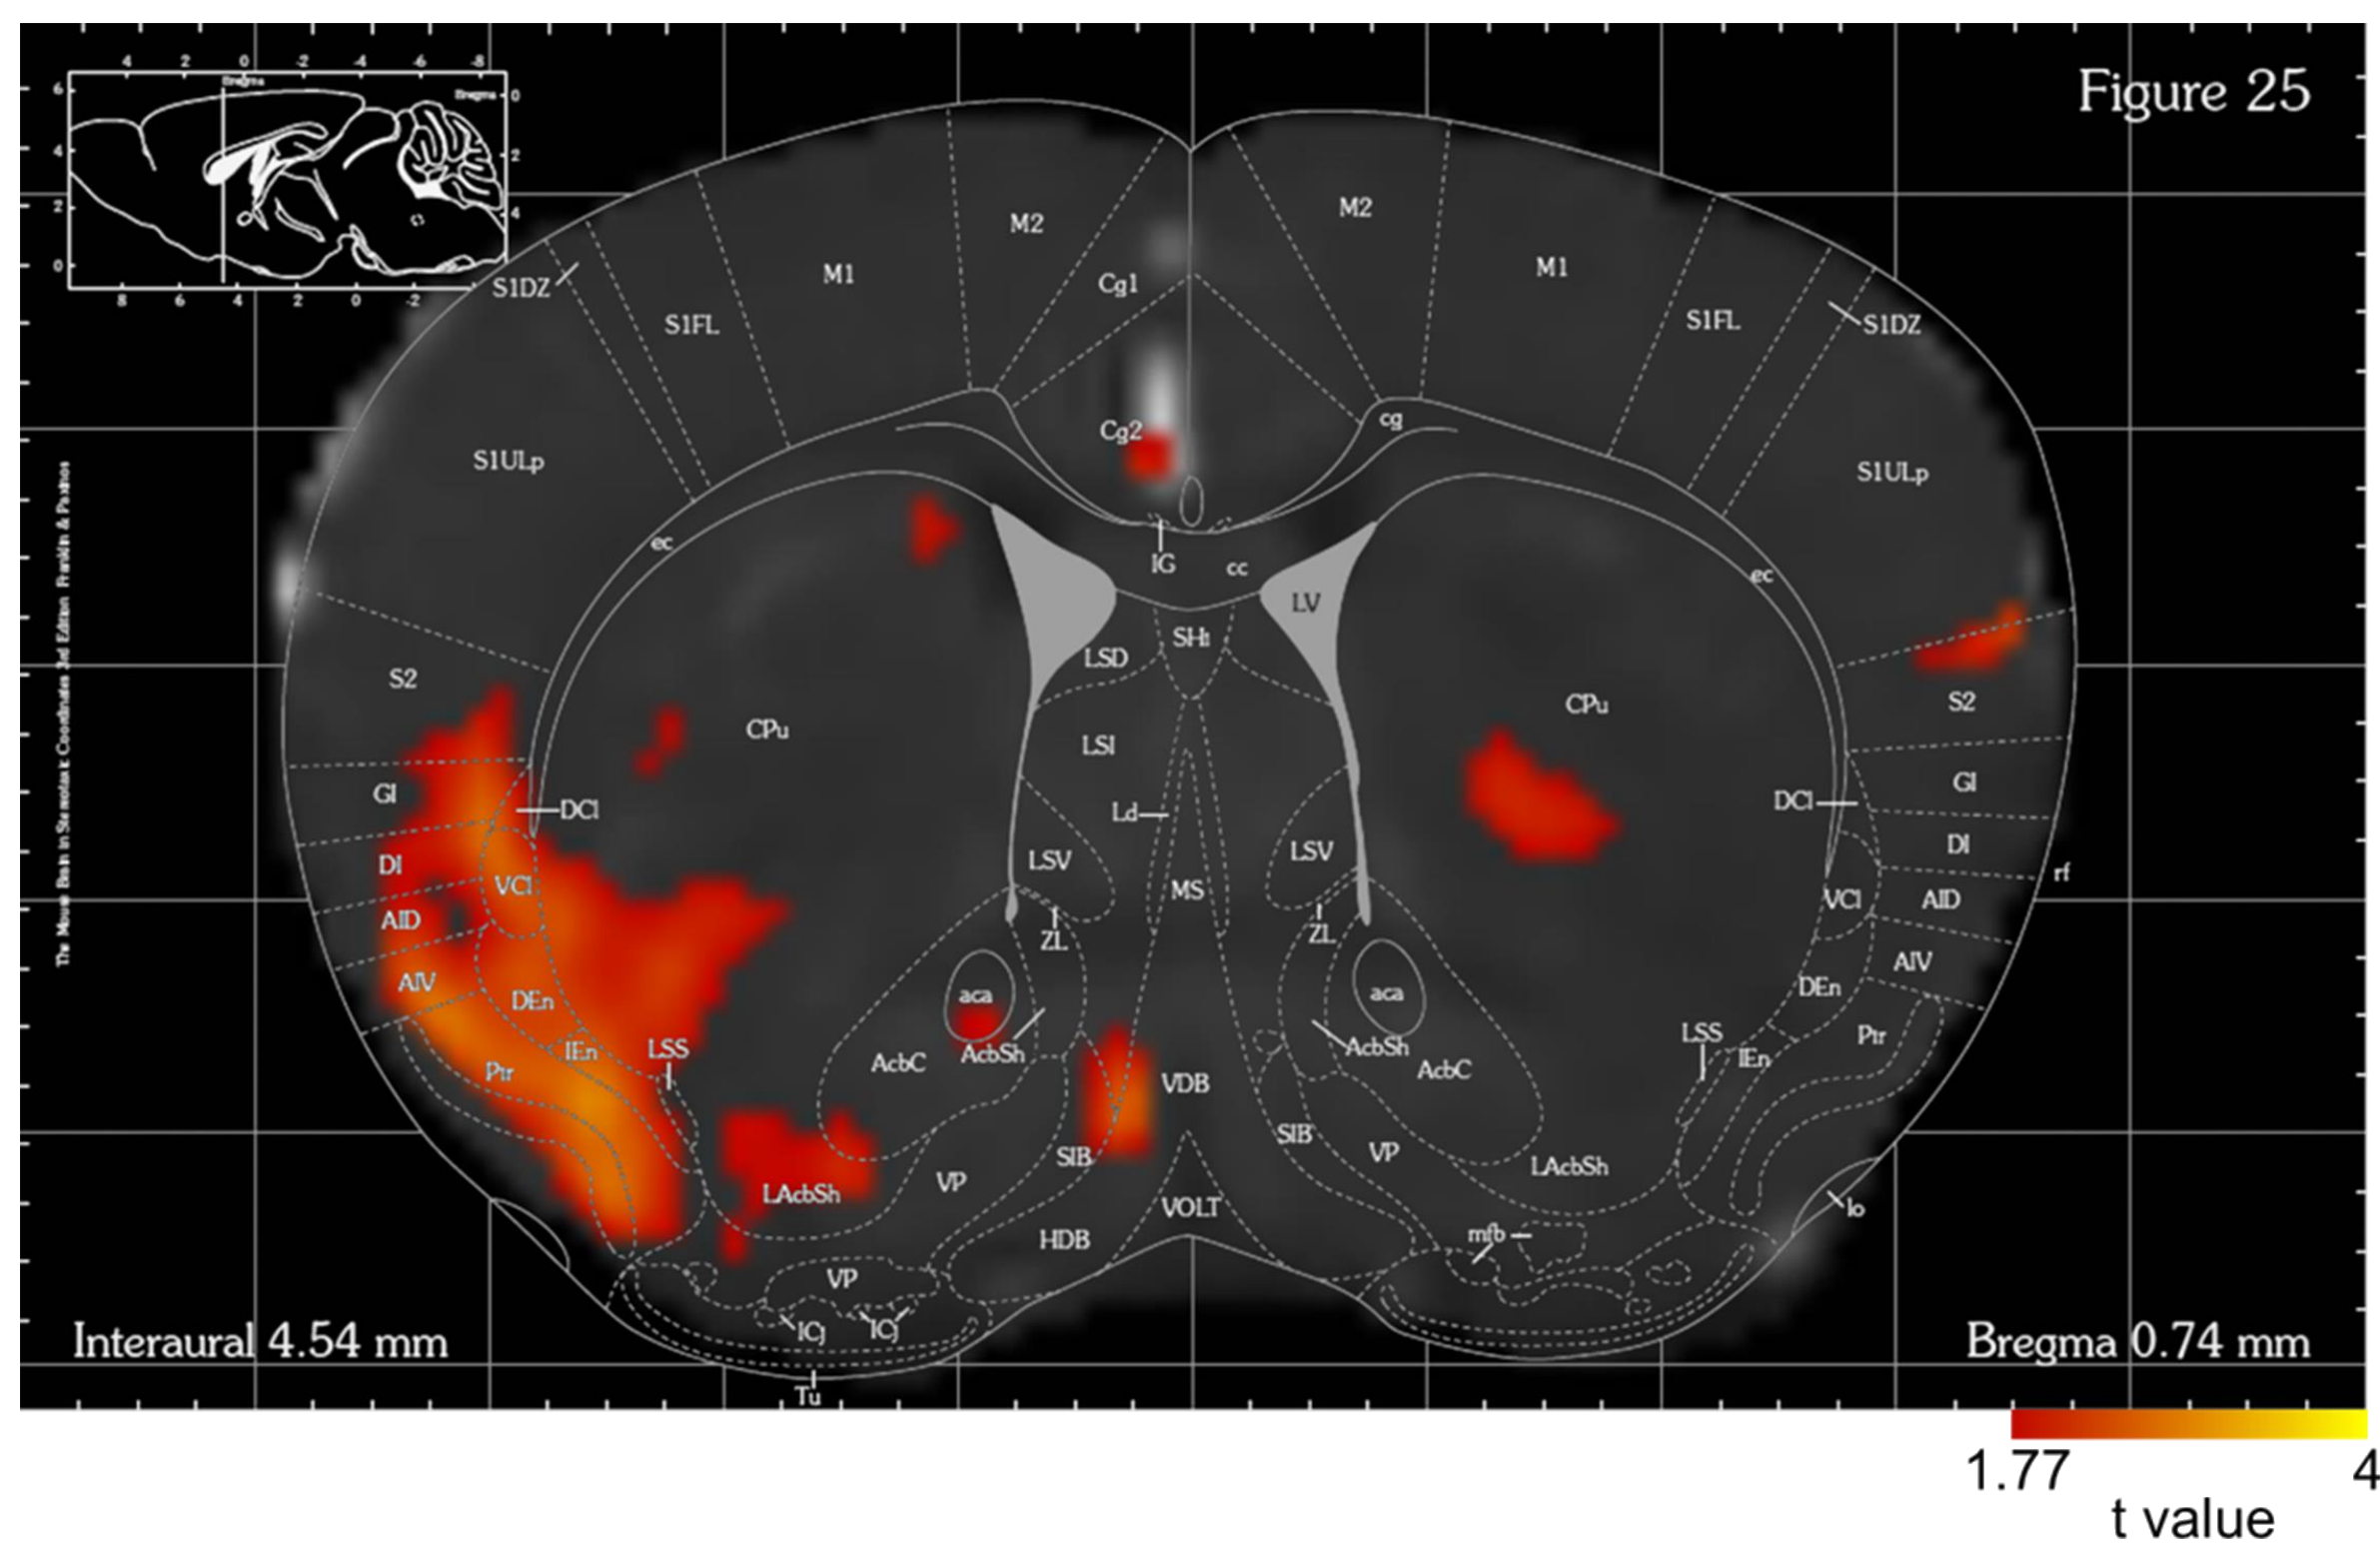

Figure S1\_2B

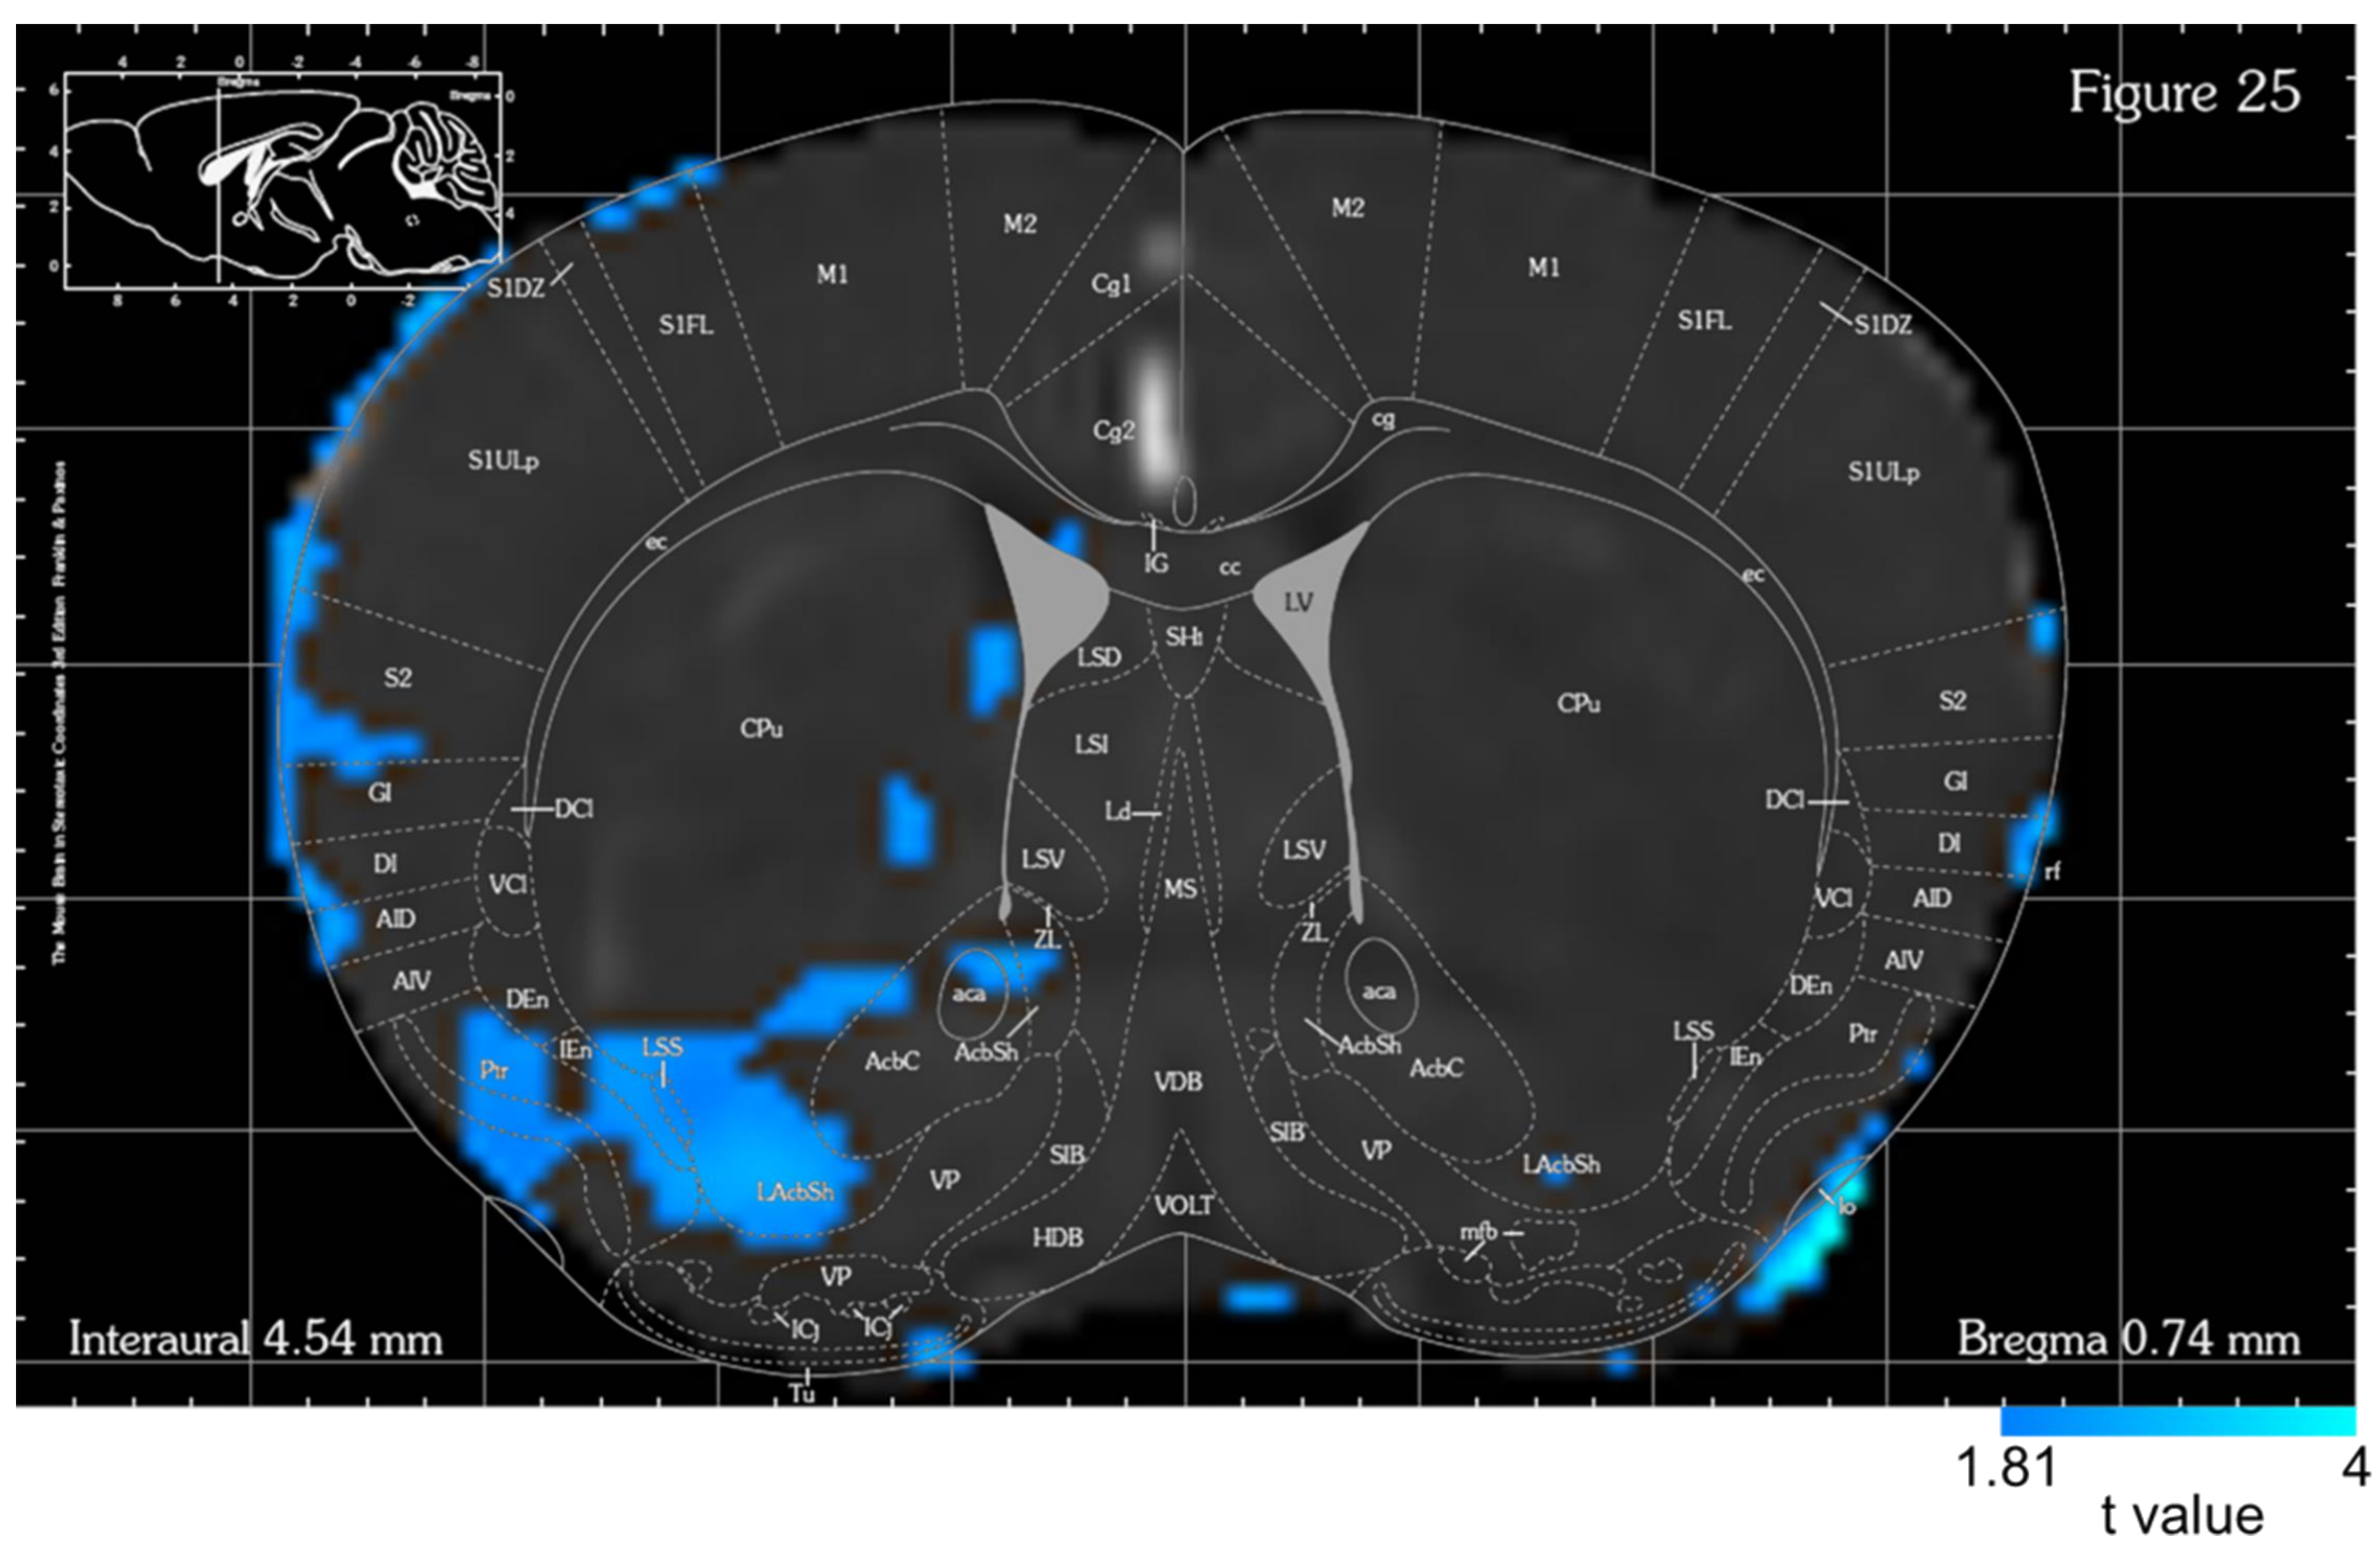



Figure S1\_3A

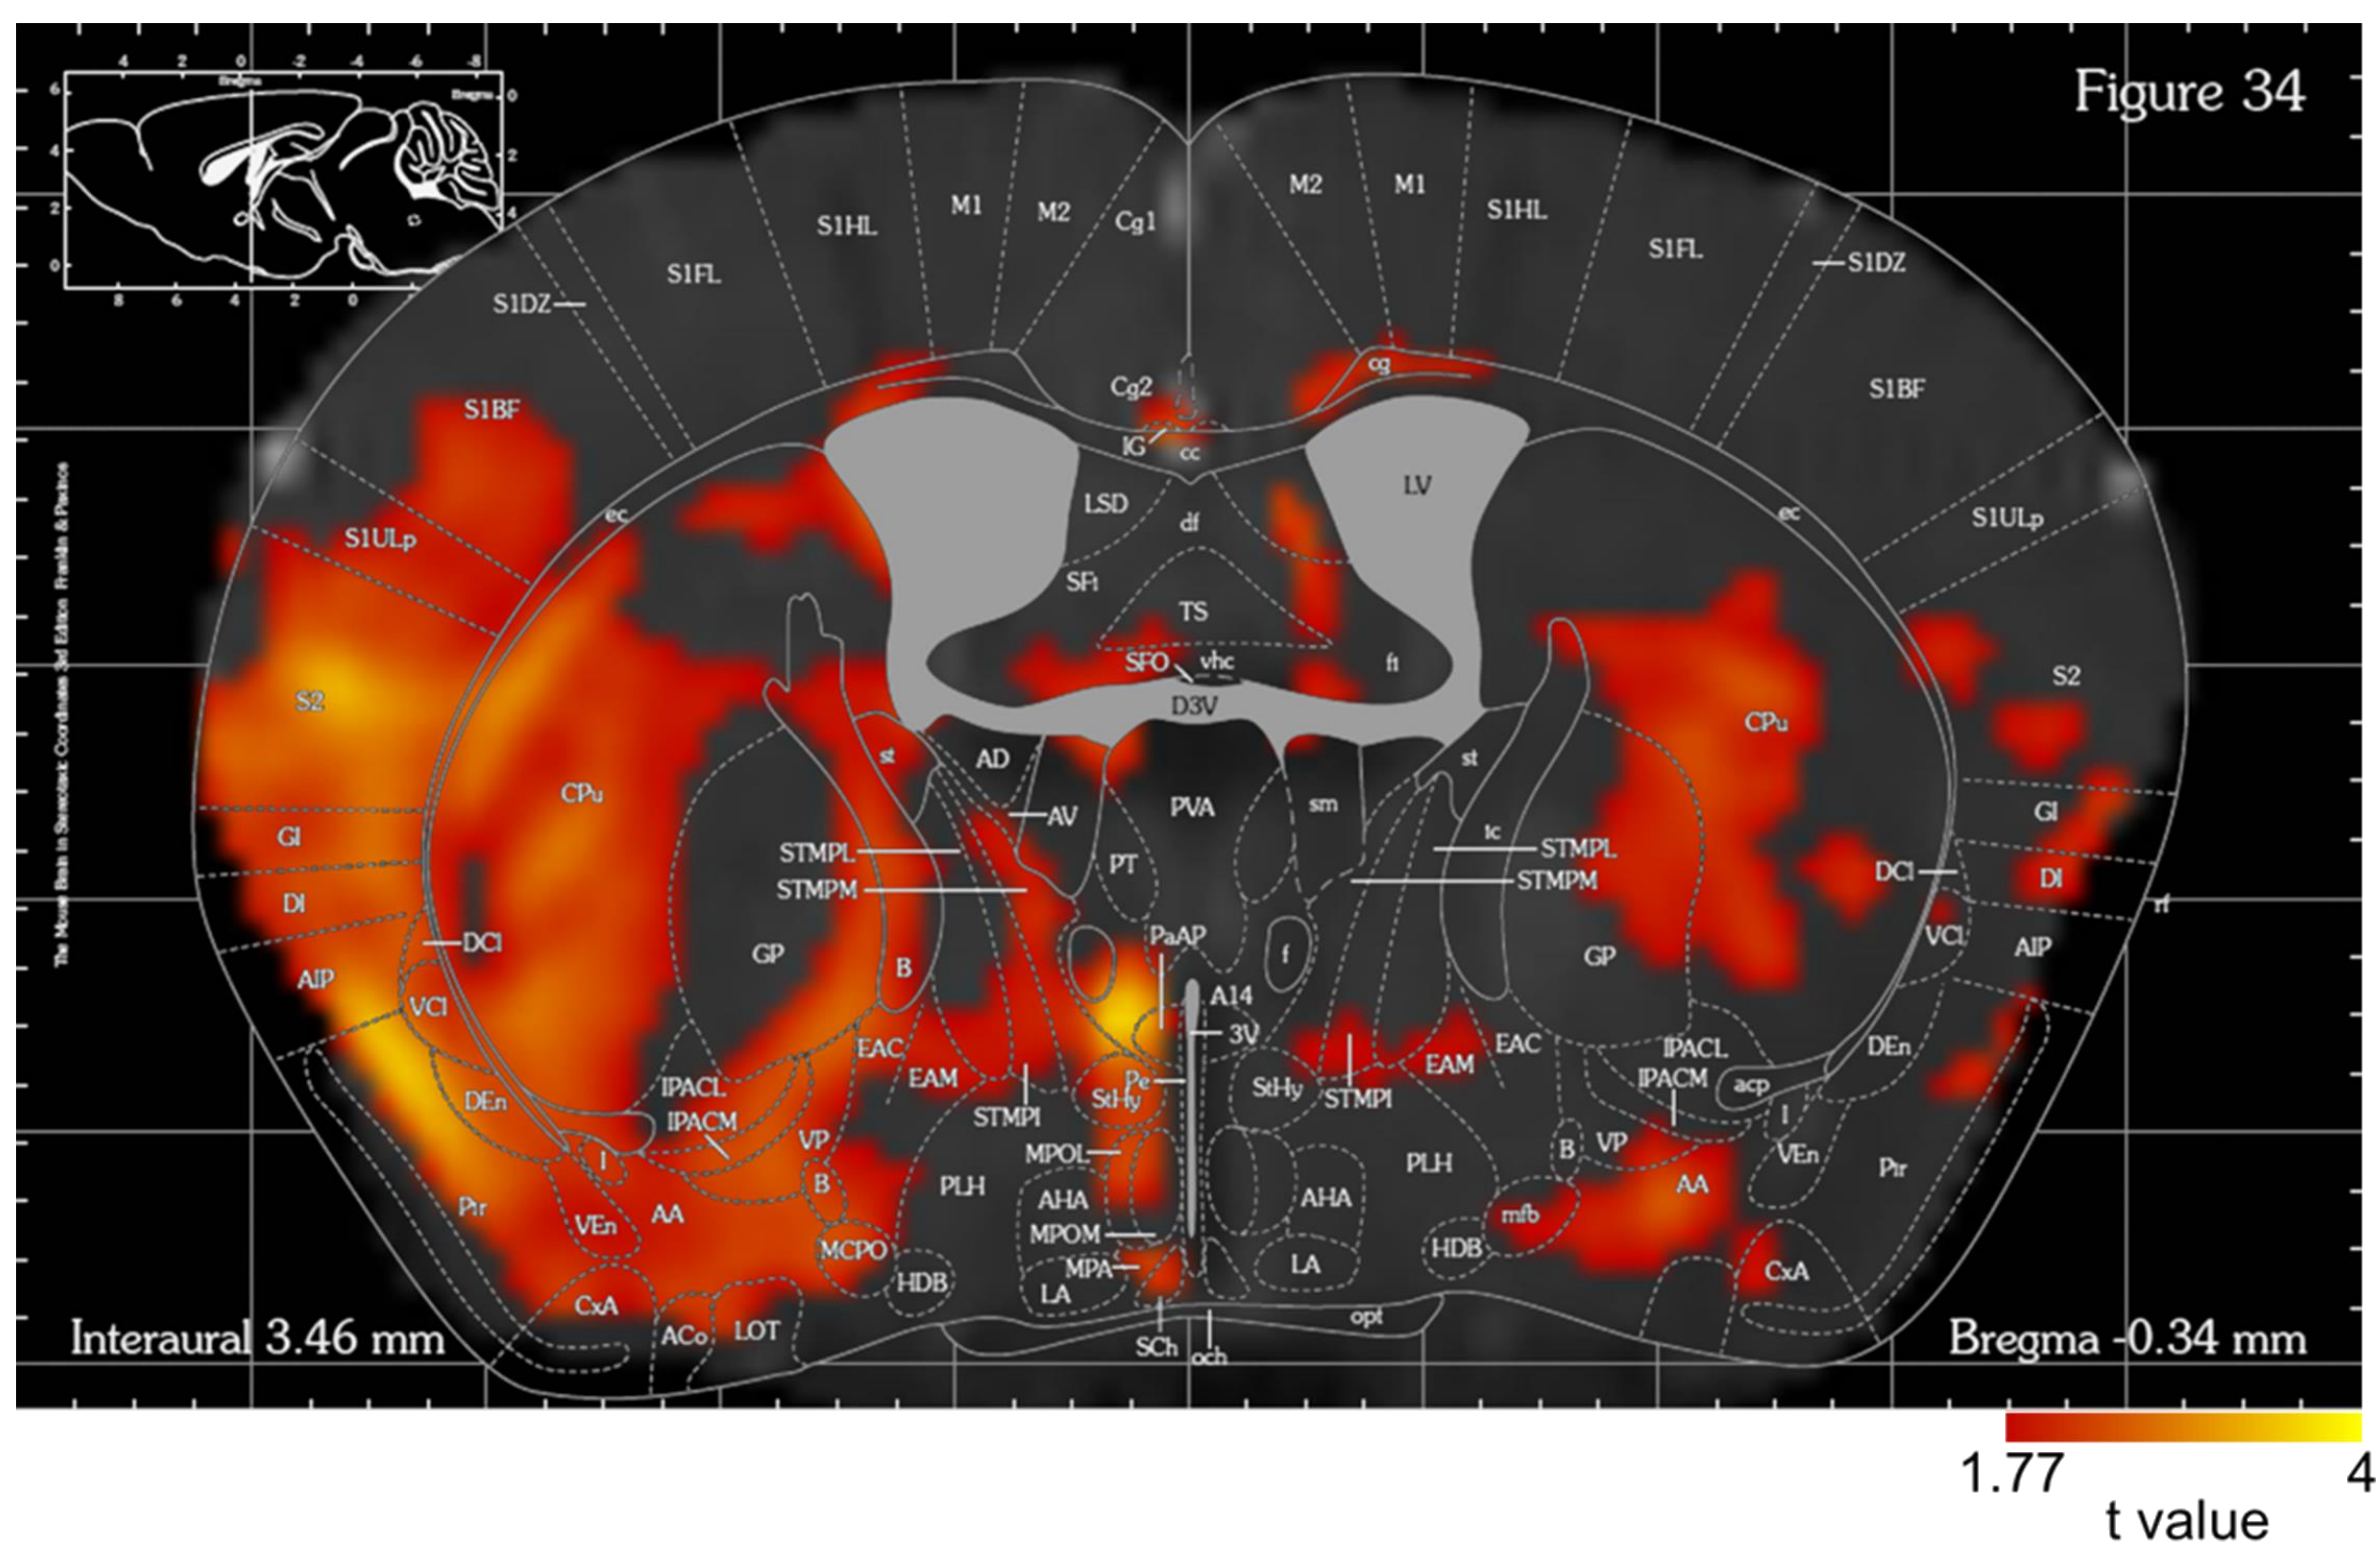

Figure S1\_3B

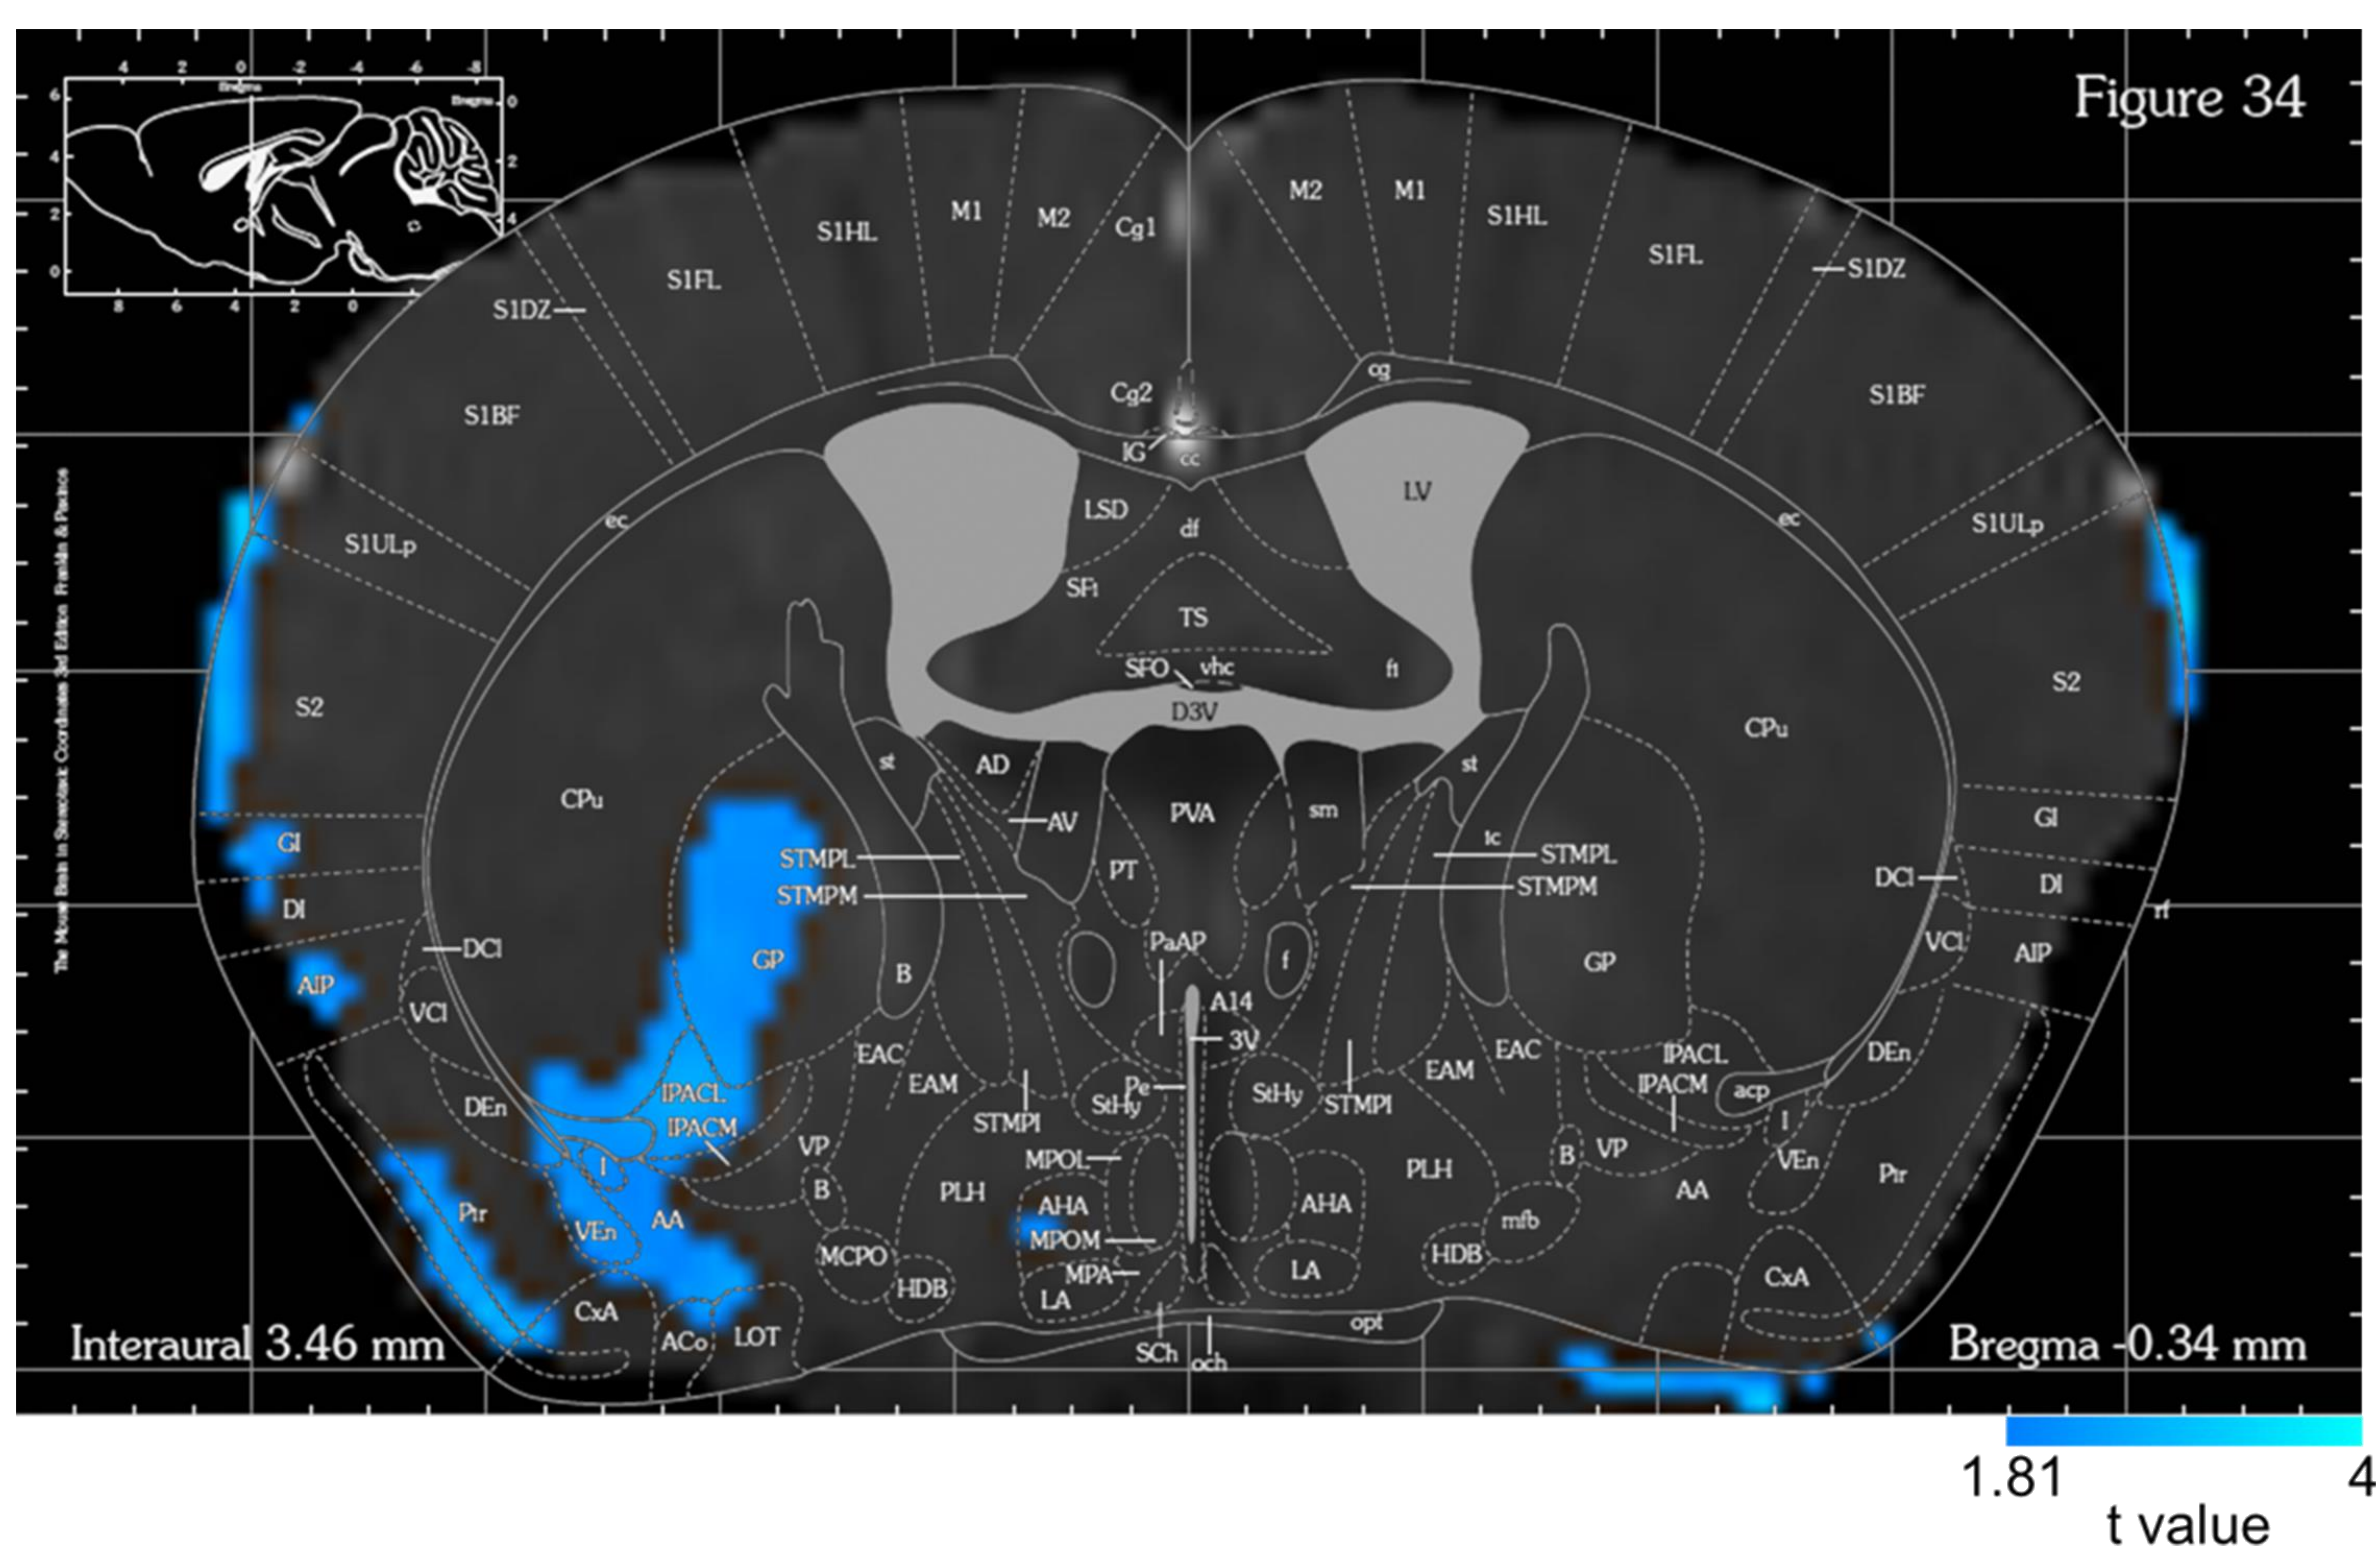



Figure S1\_4A

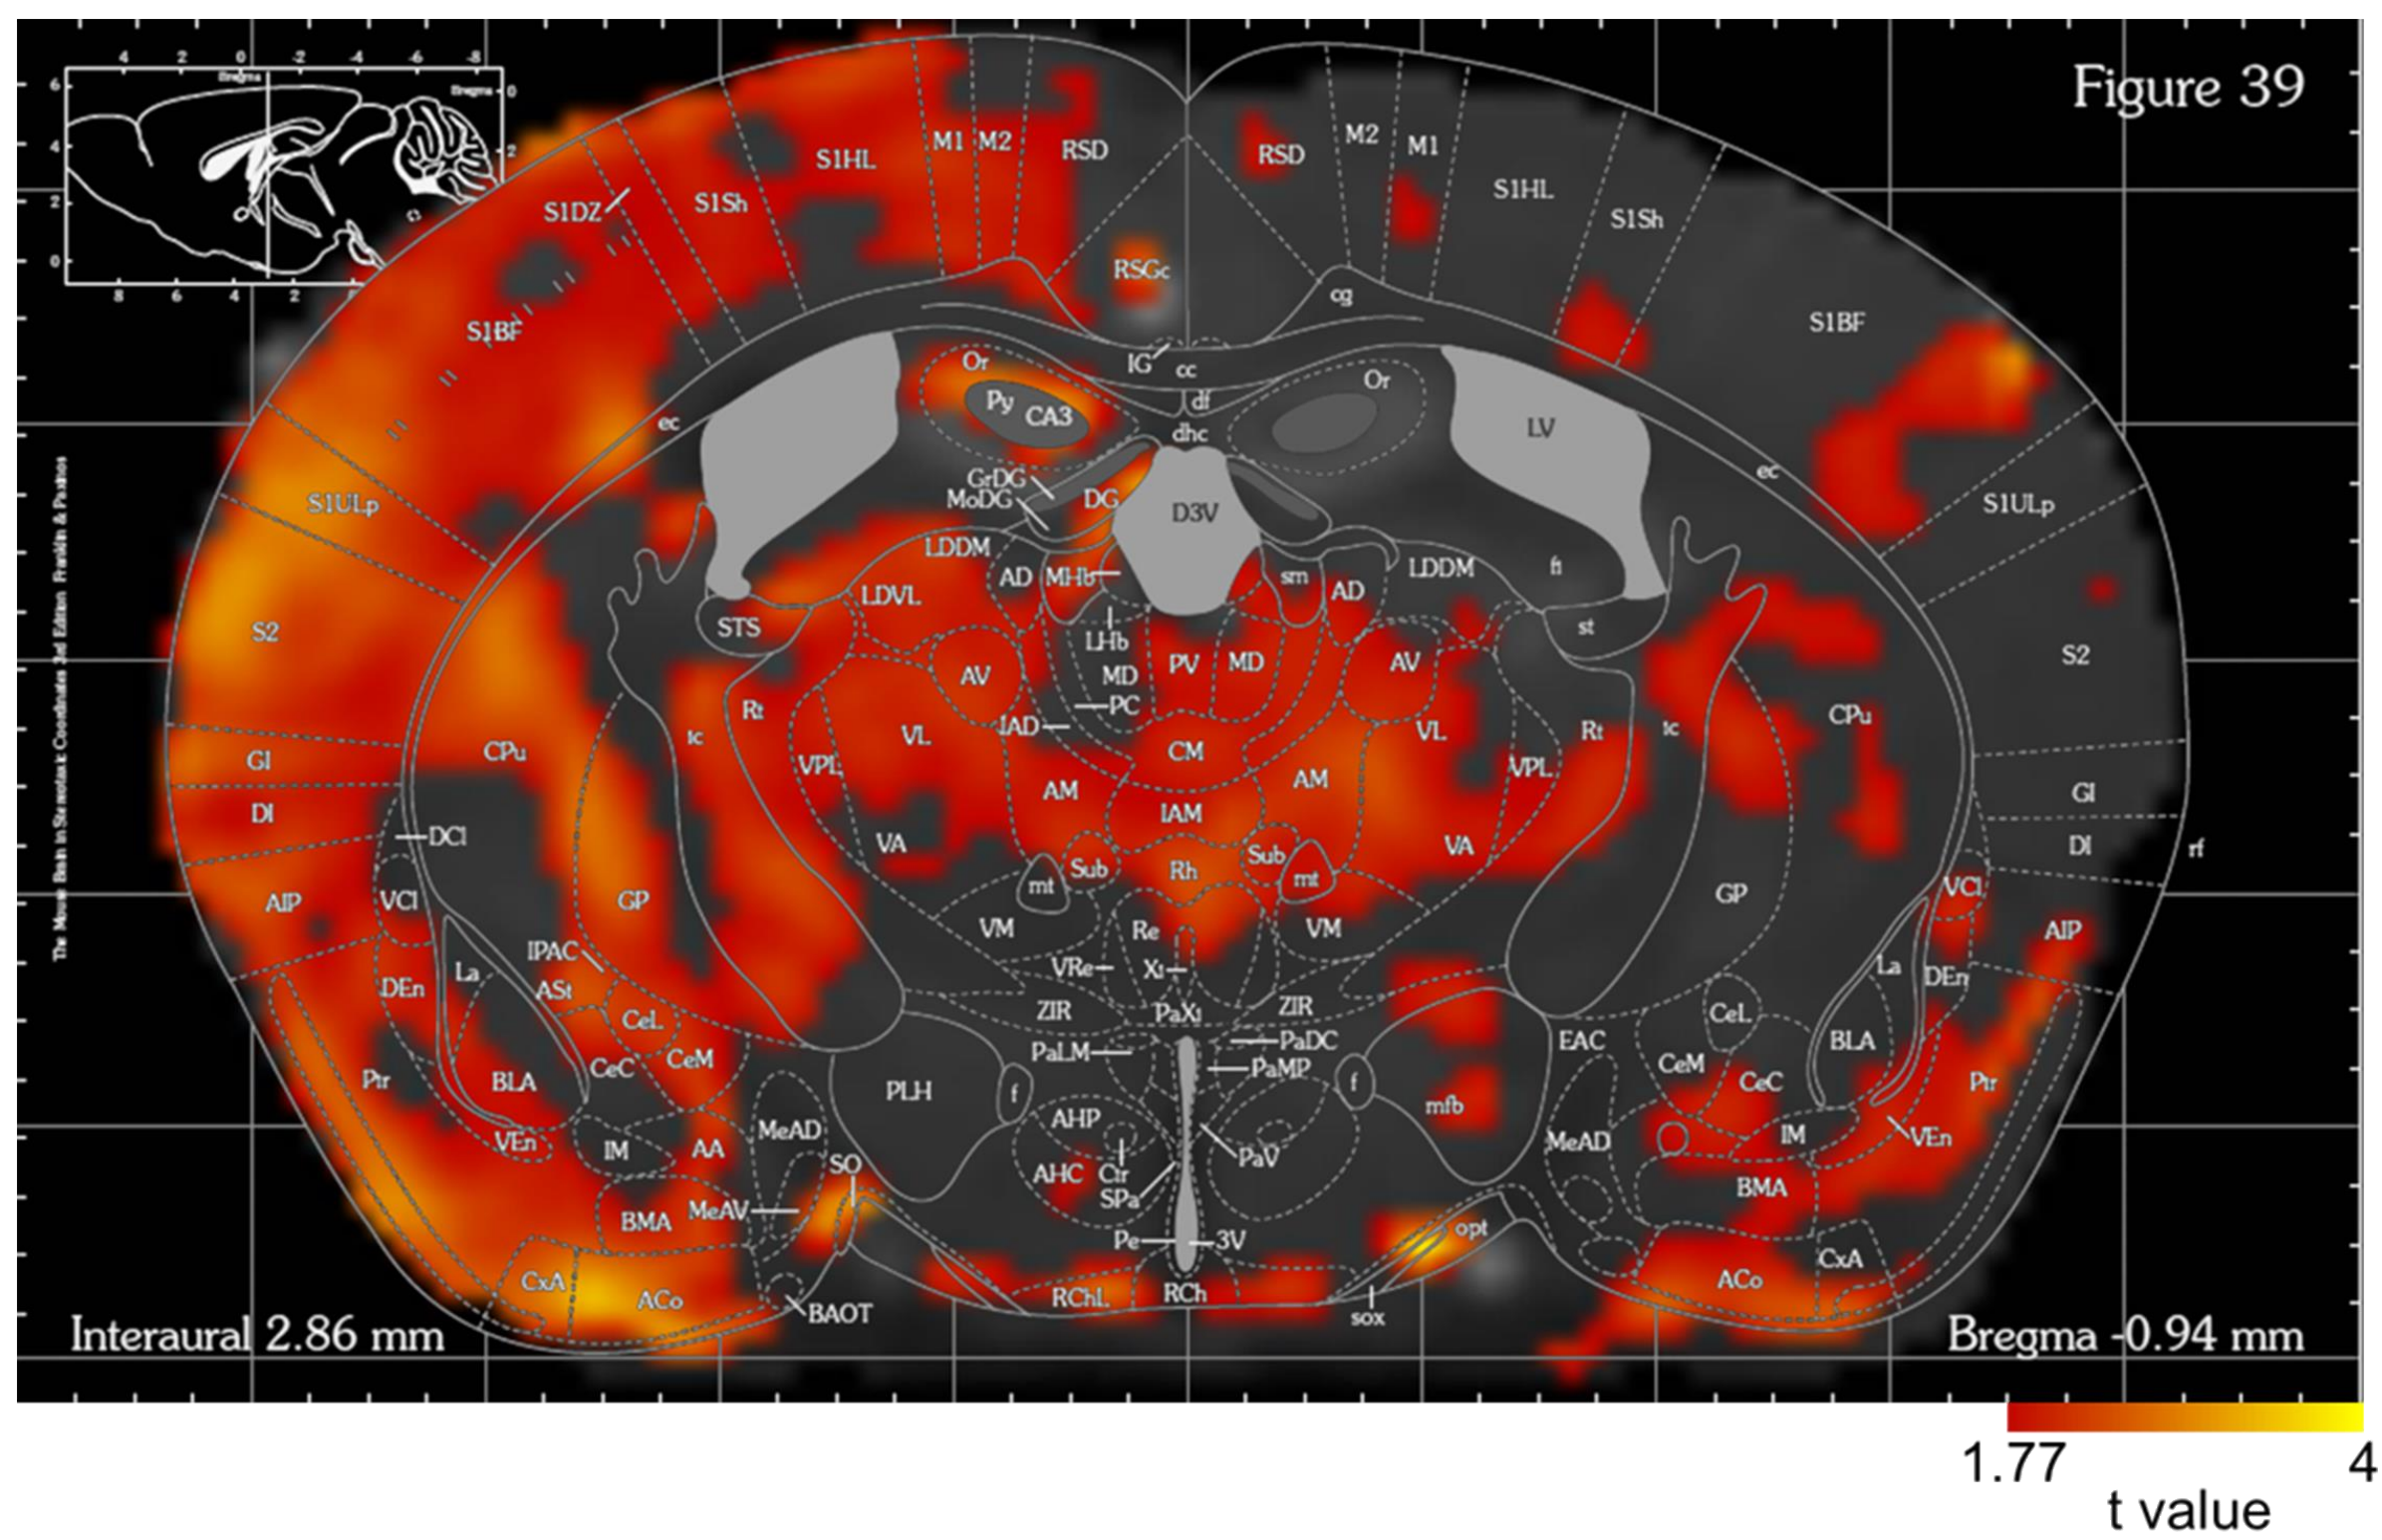

Figure S1\_4B

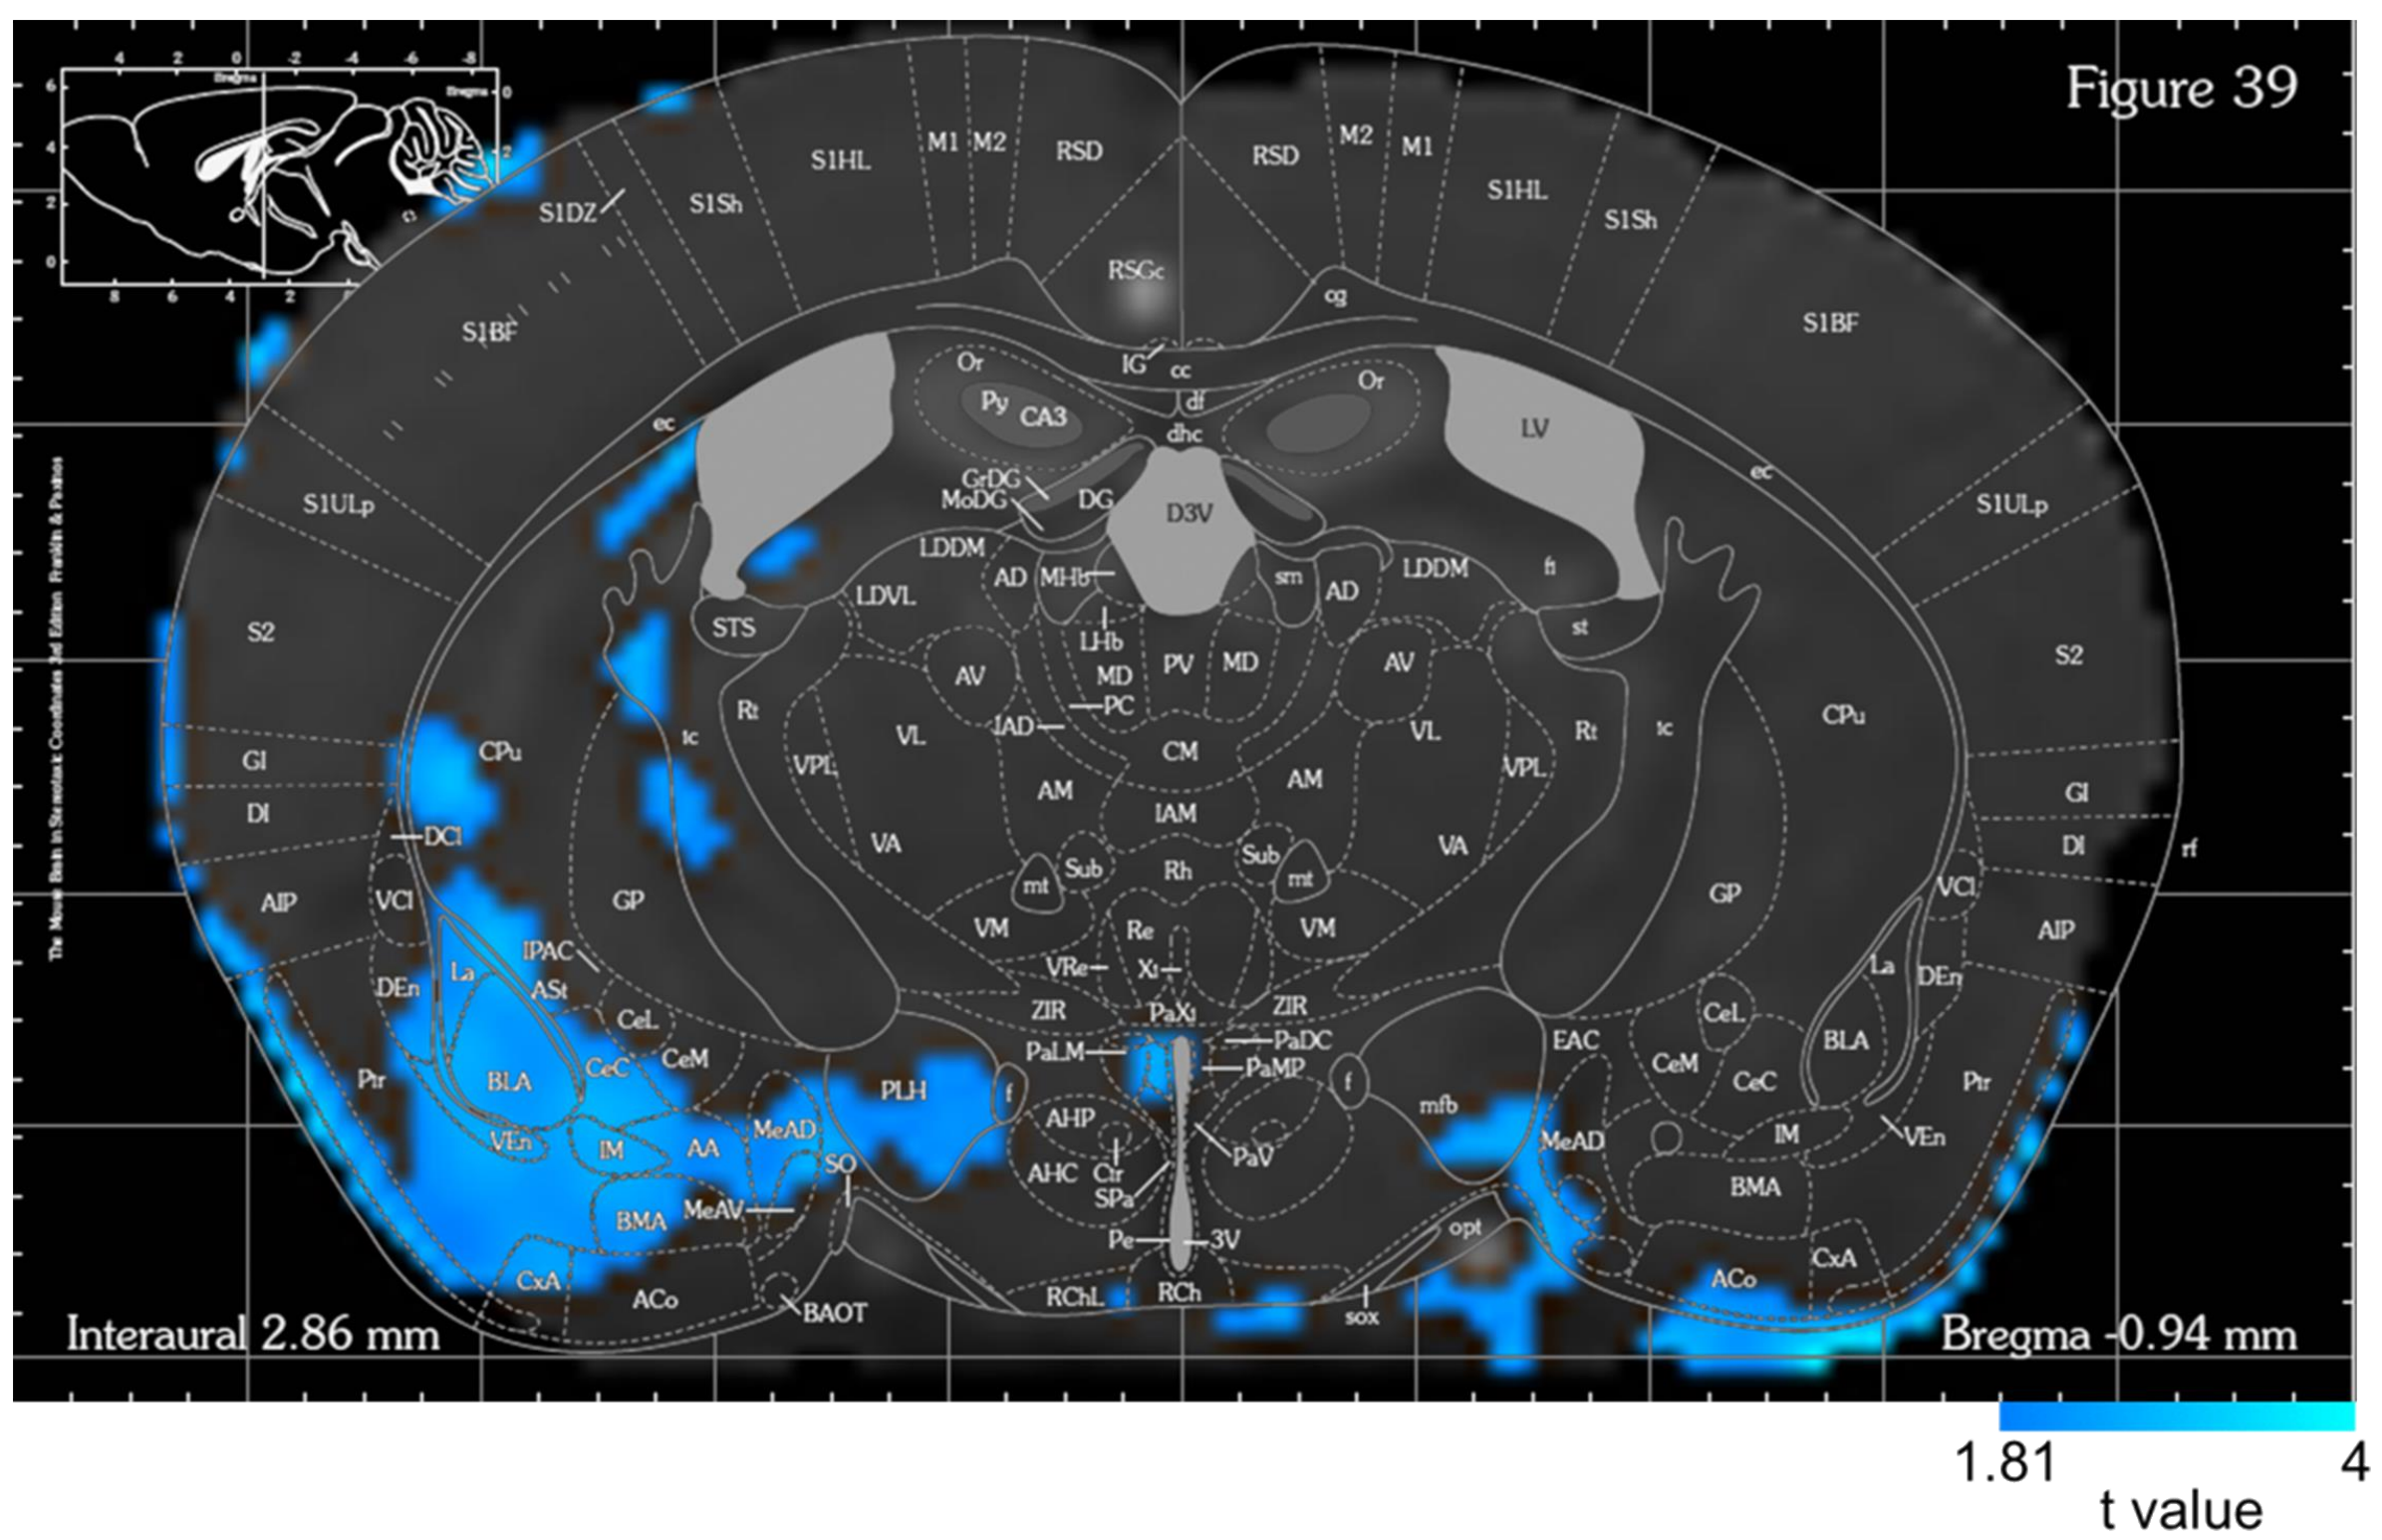



Figure S1\_5A

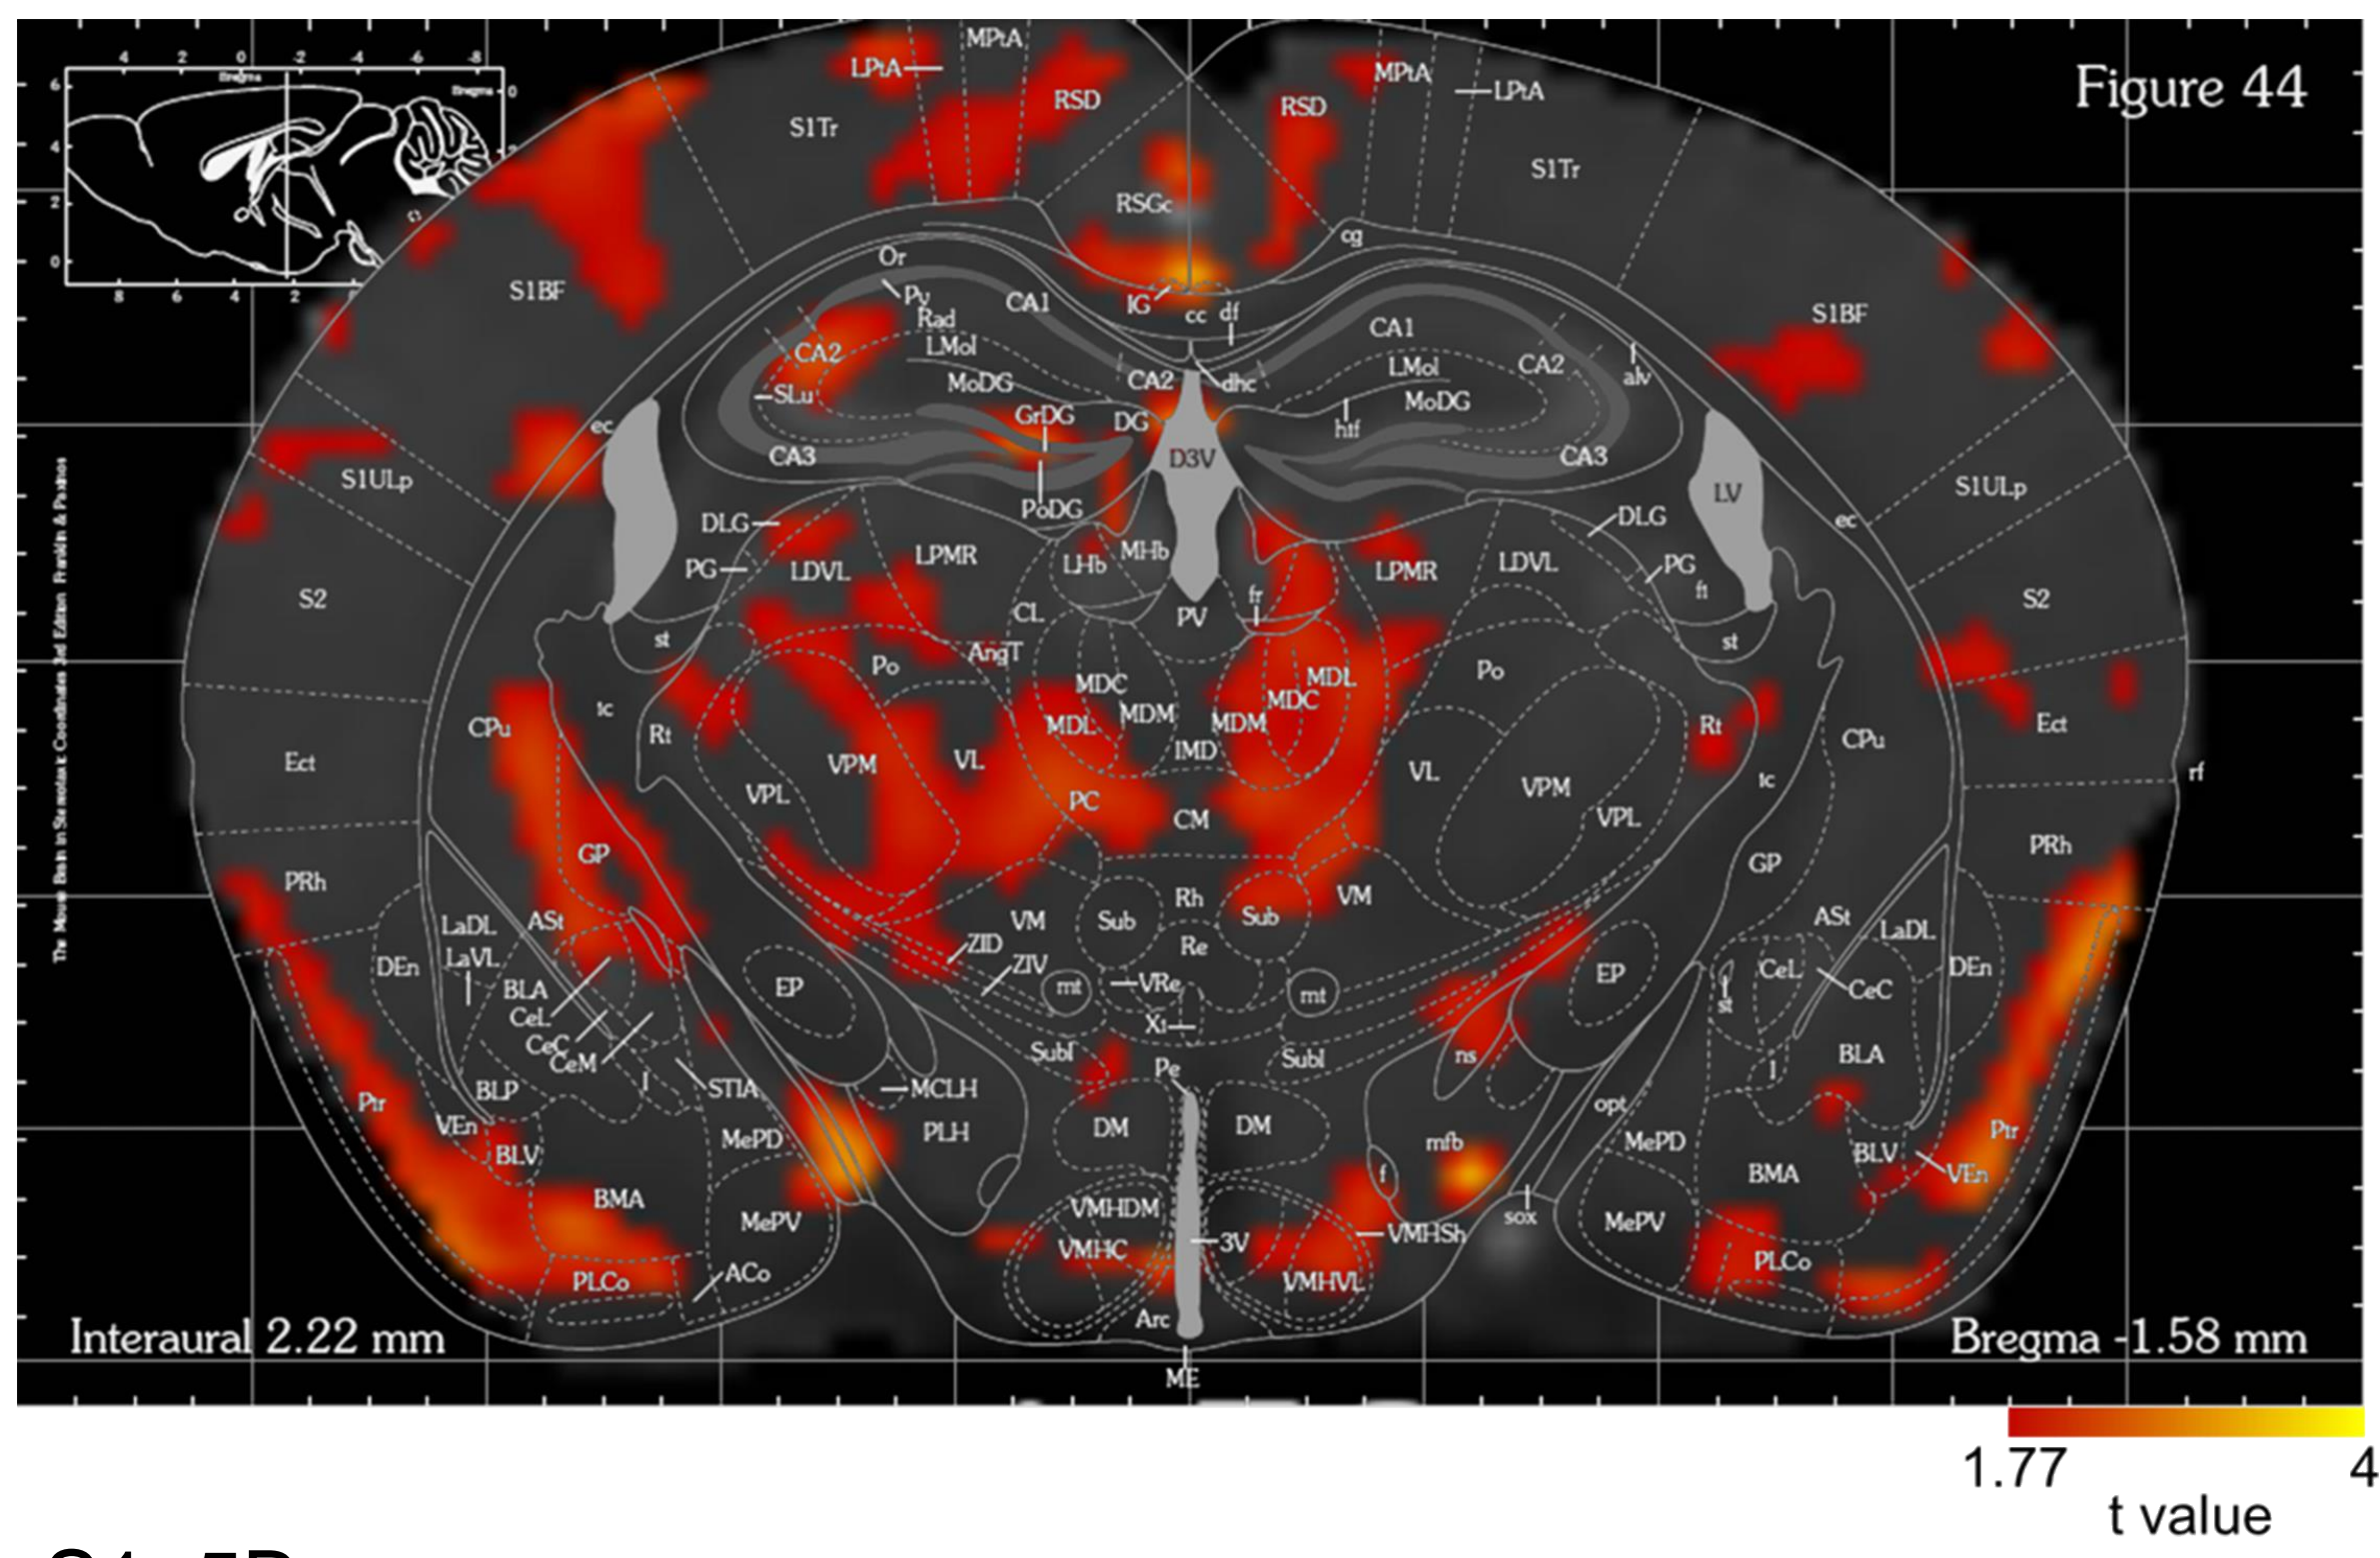

Figure S1\_5B

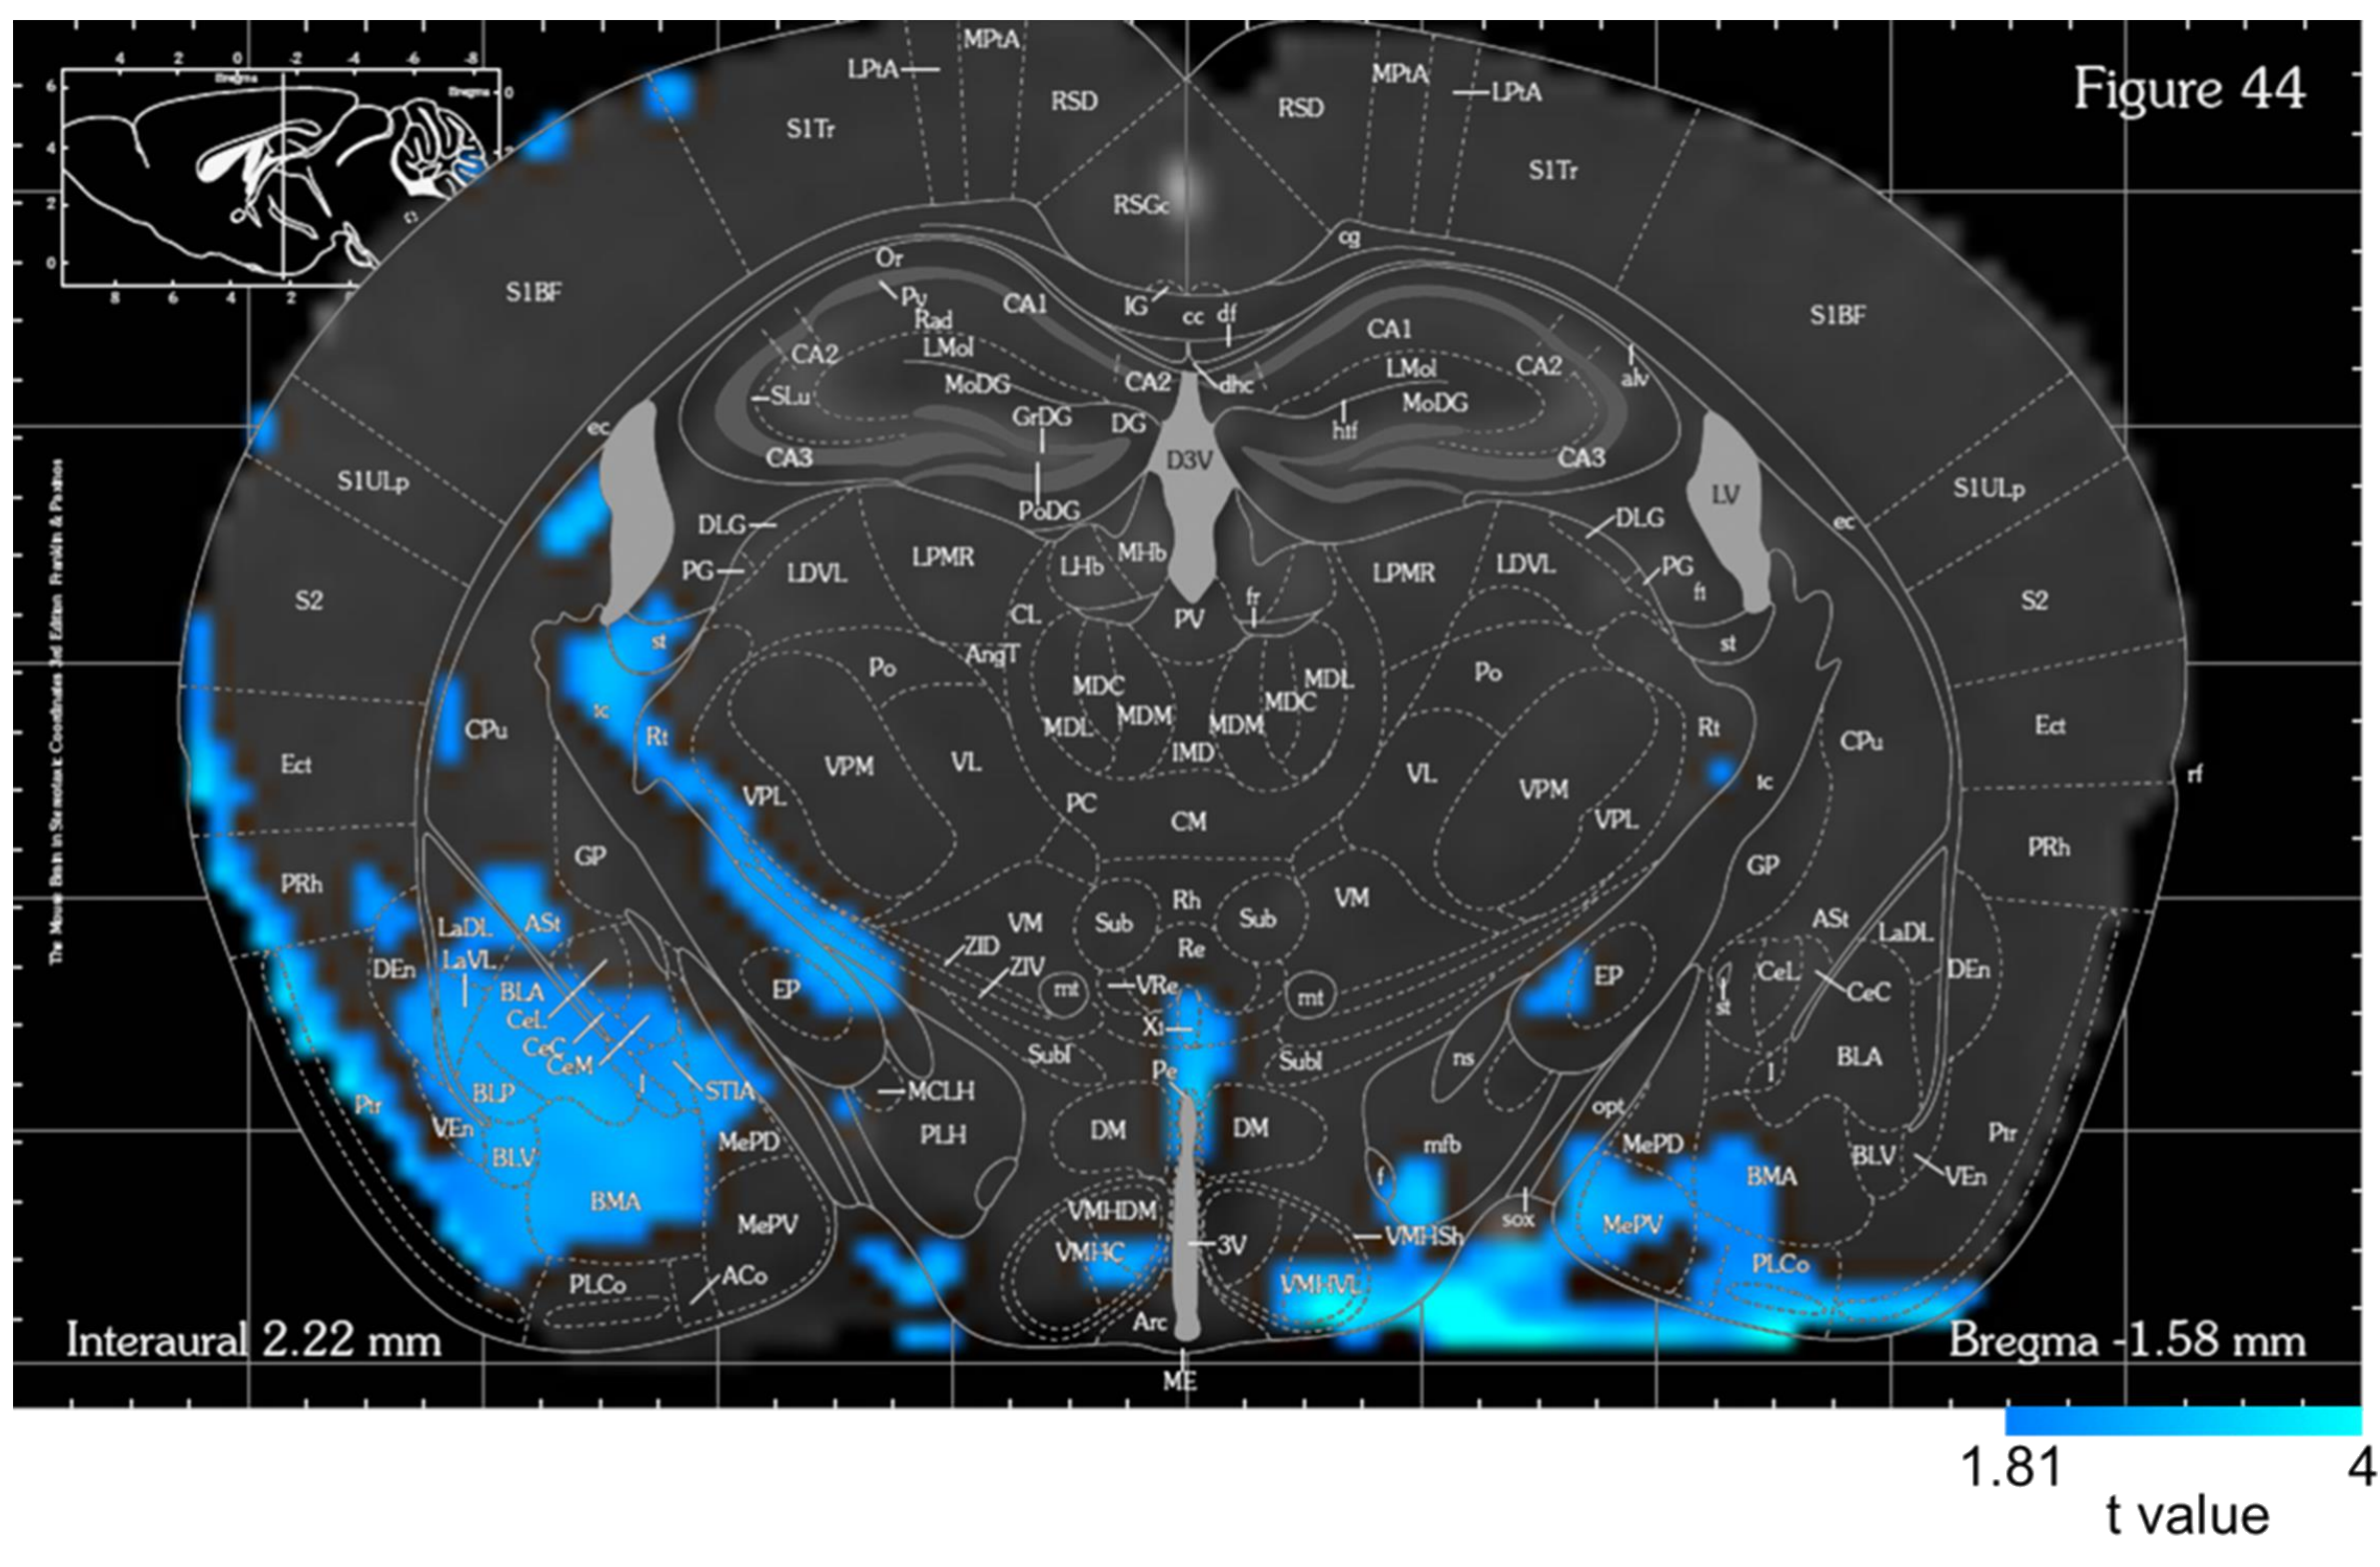



Figure S1\_6A

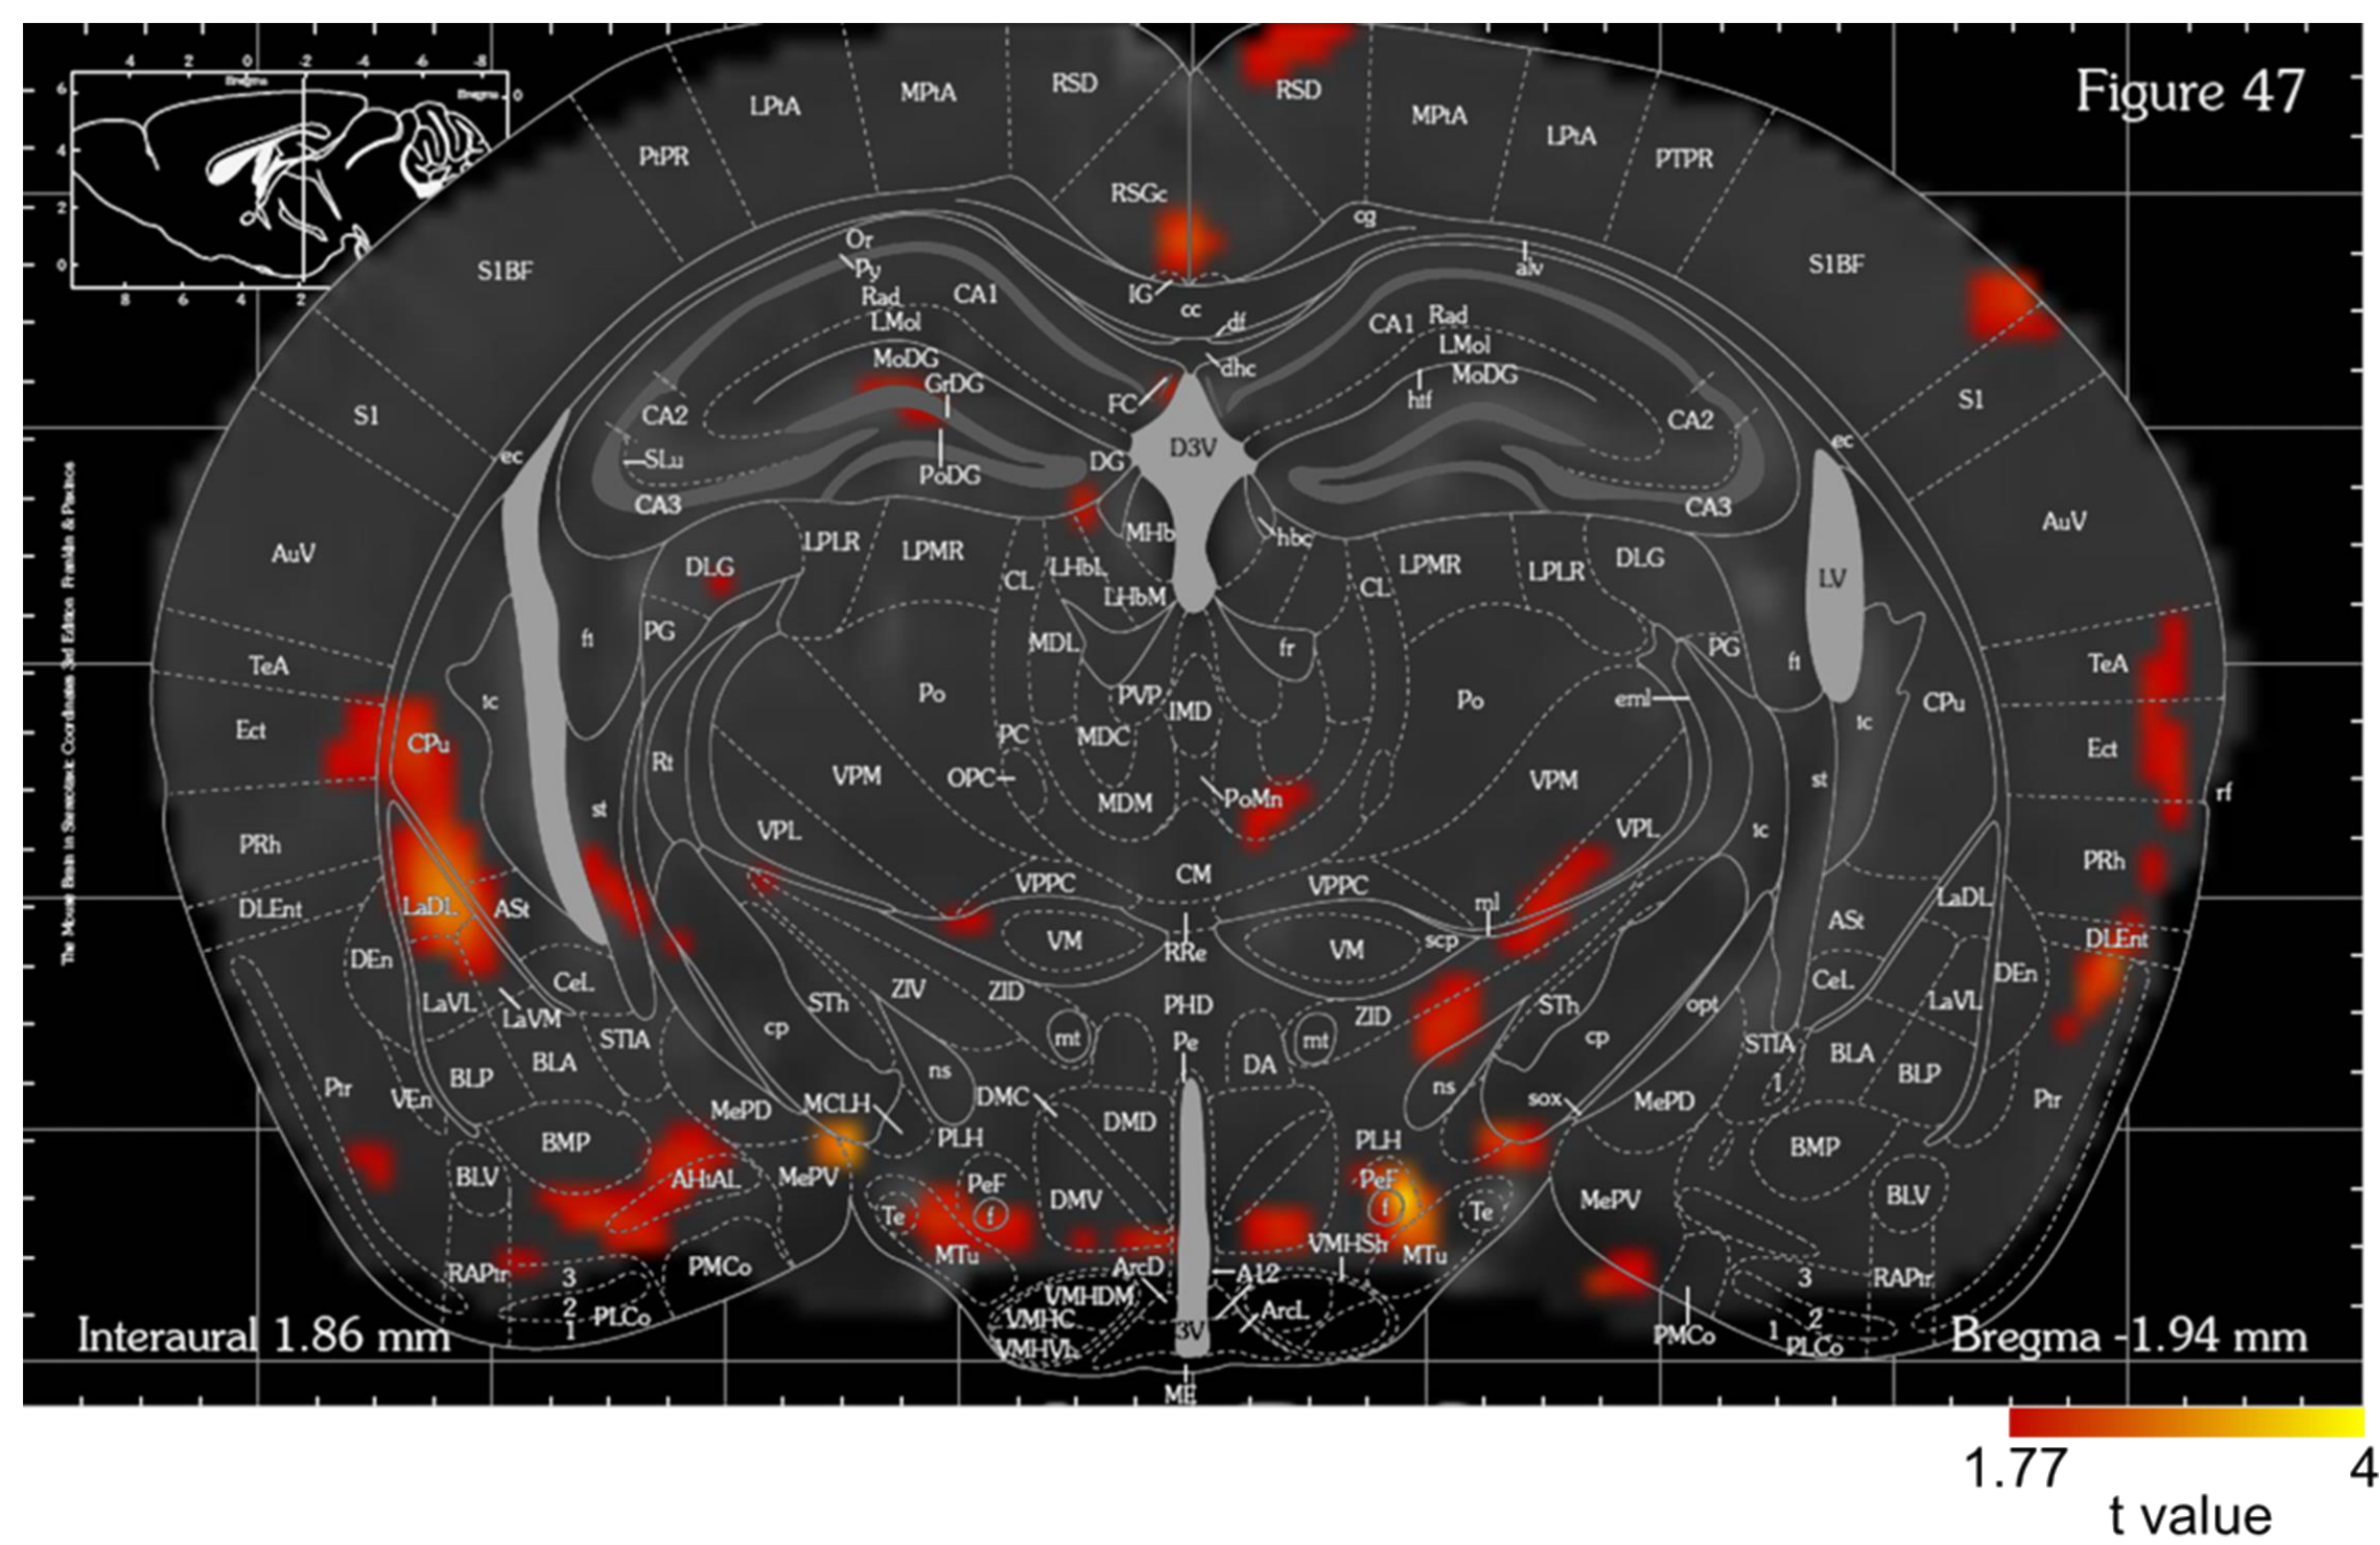

Figure S1\_6B

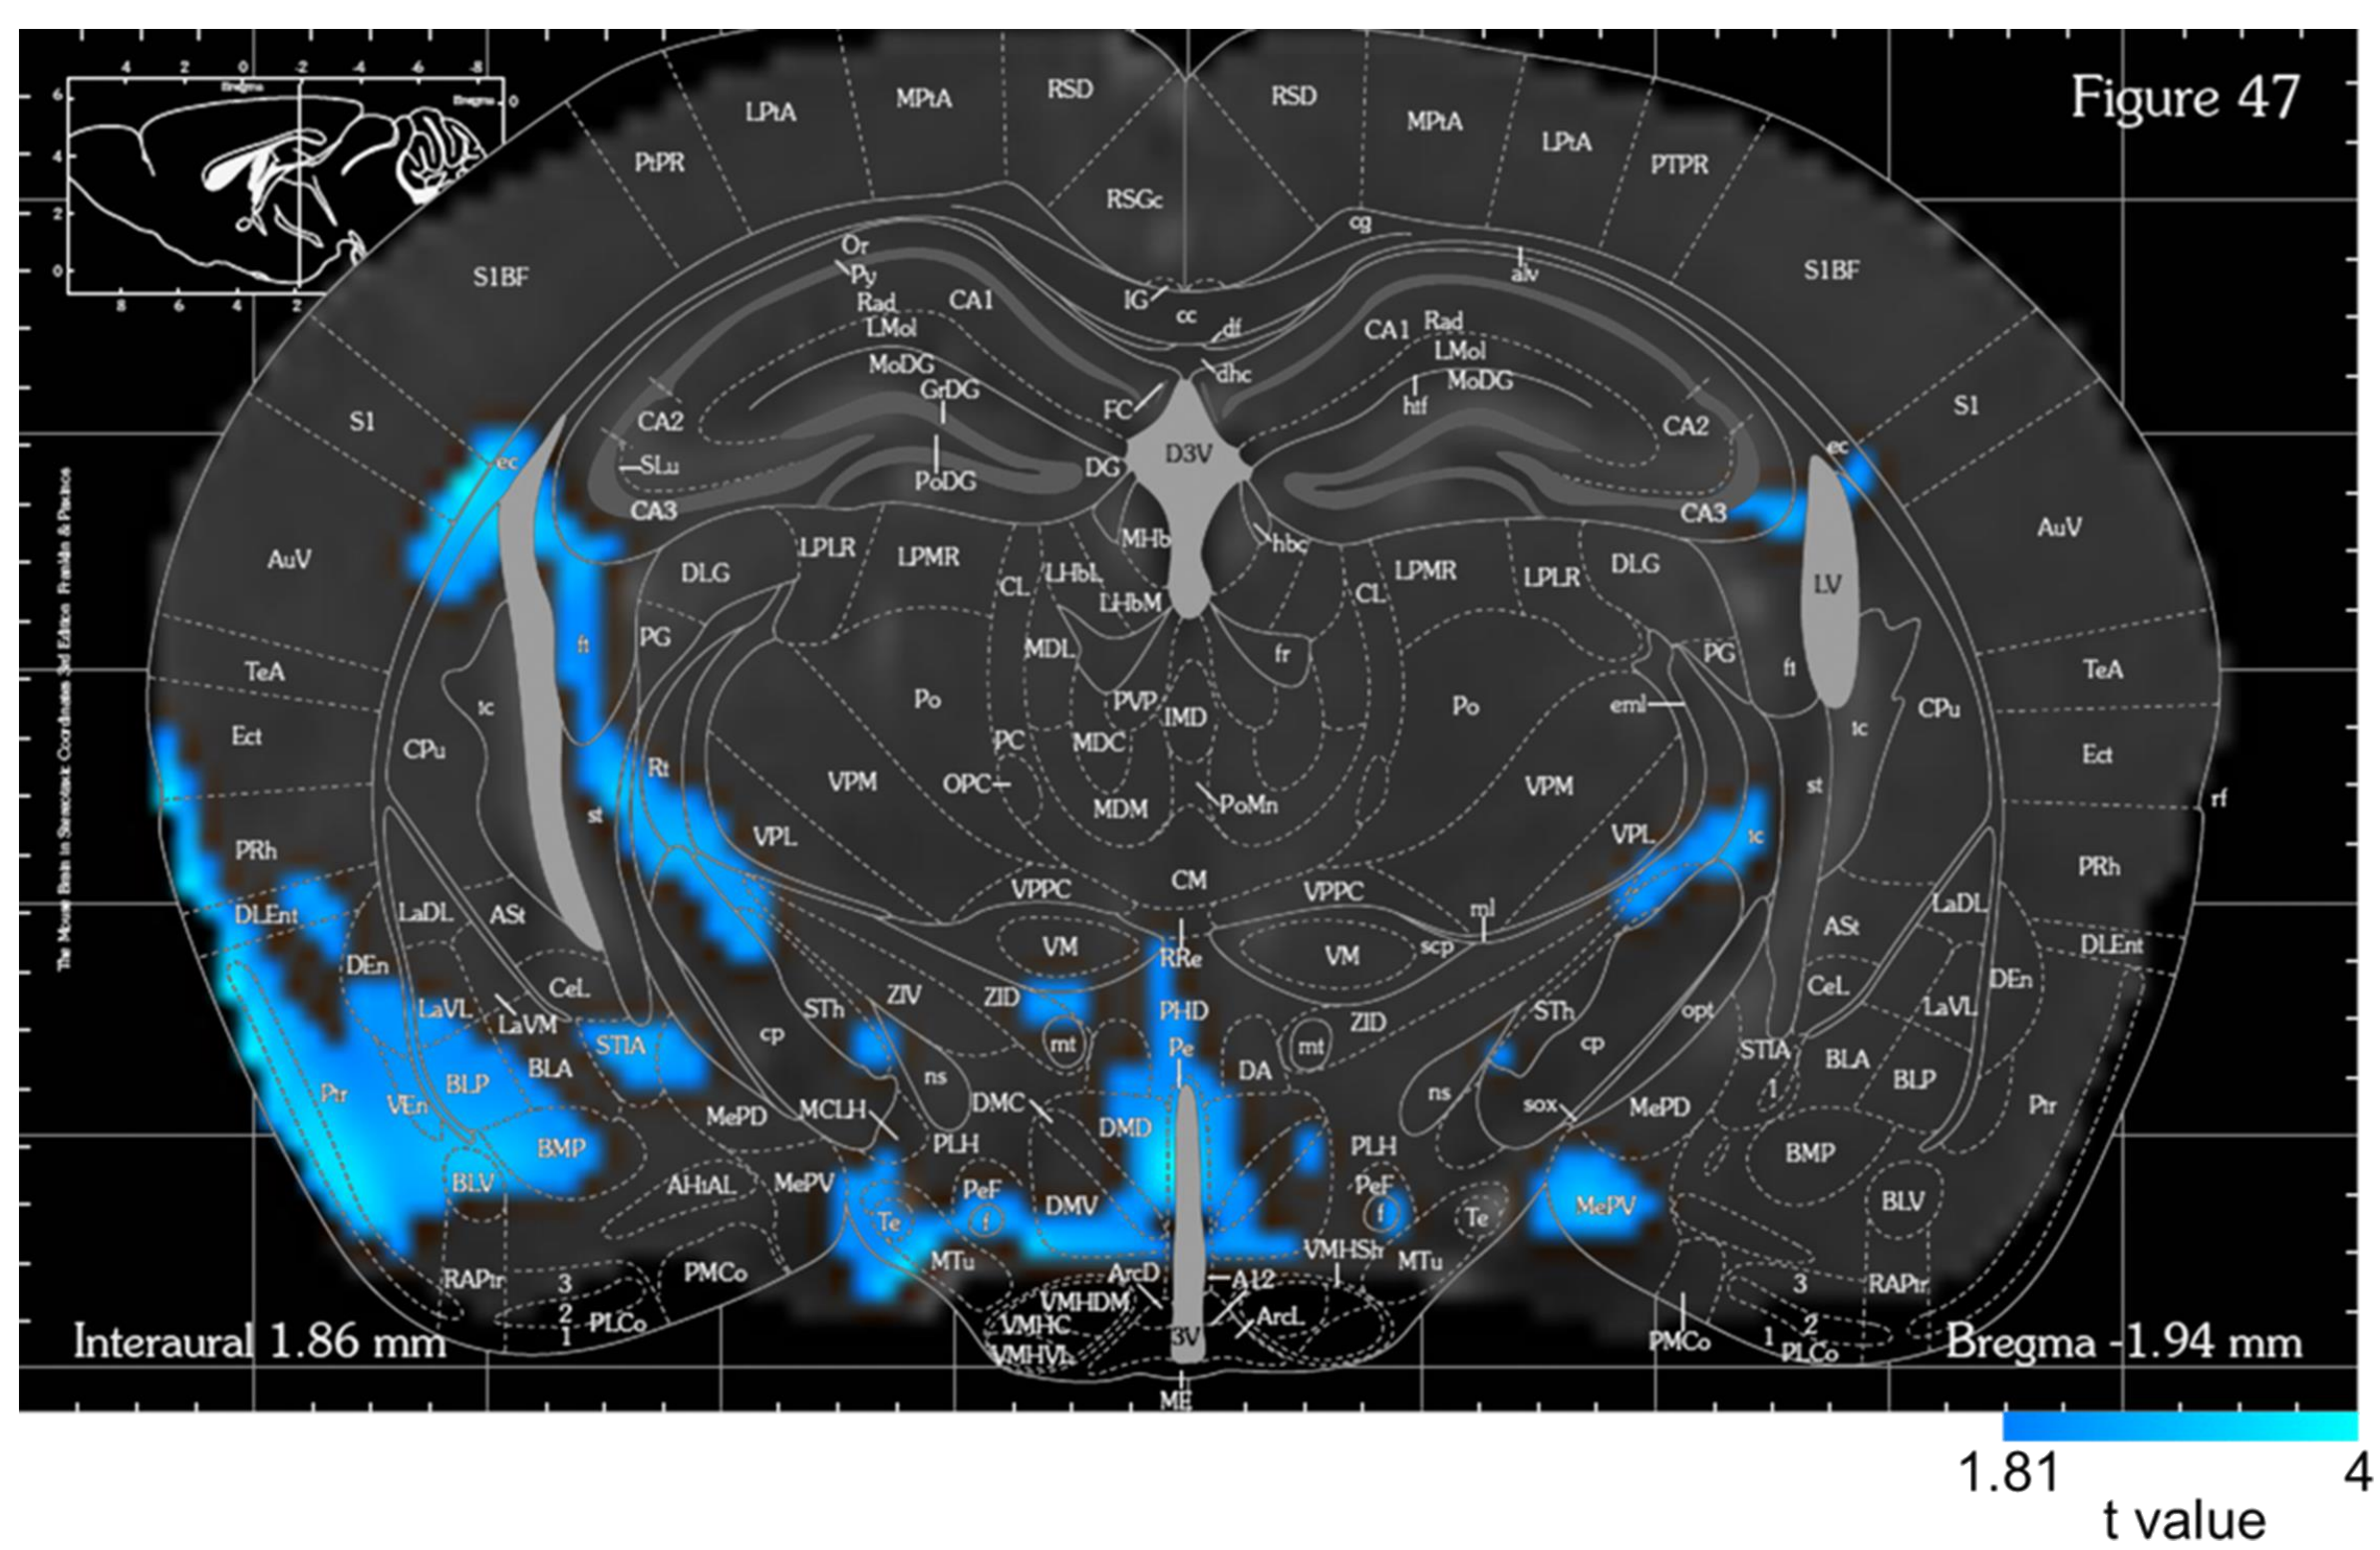



Figure S1\_7A

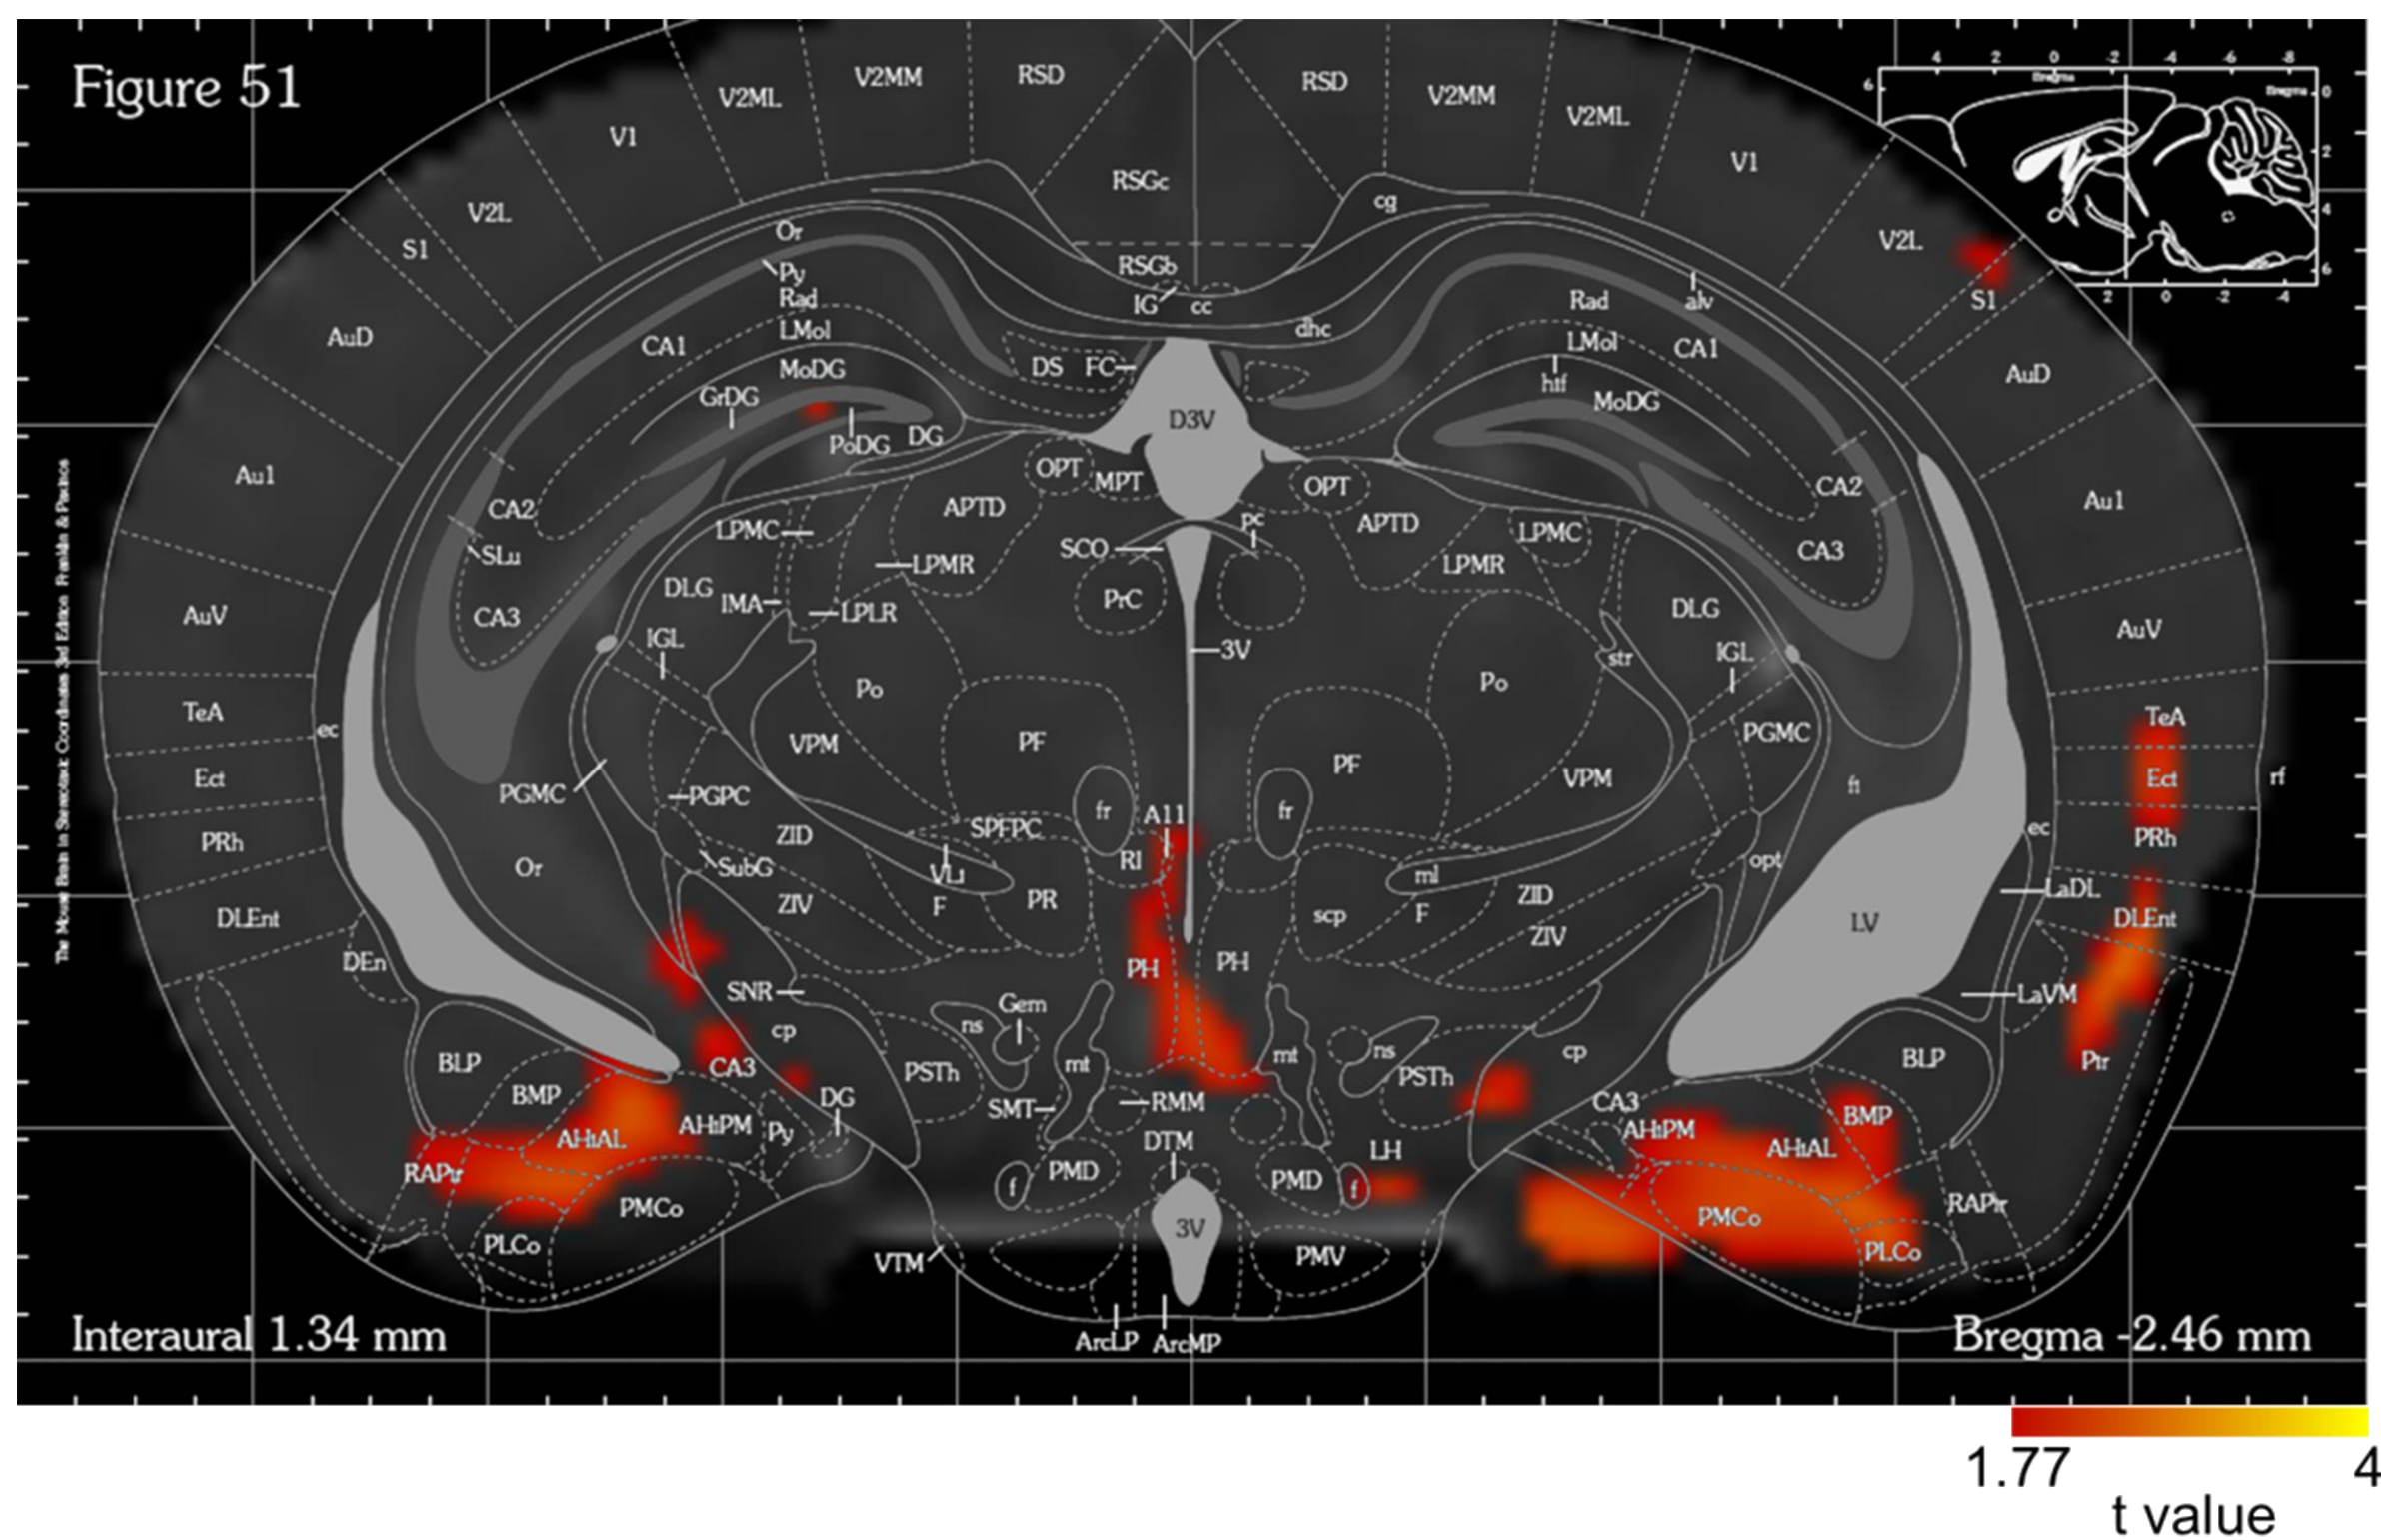

# Figure S1\_7B

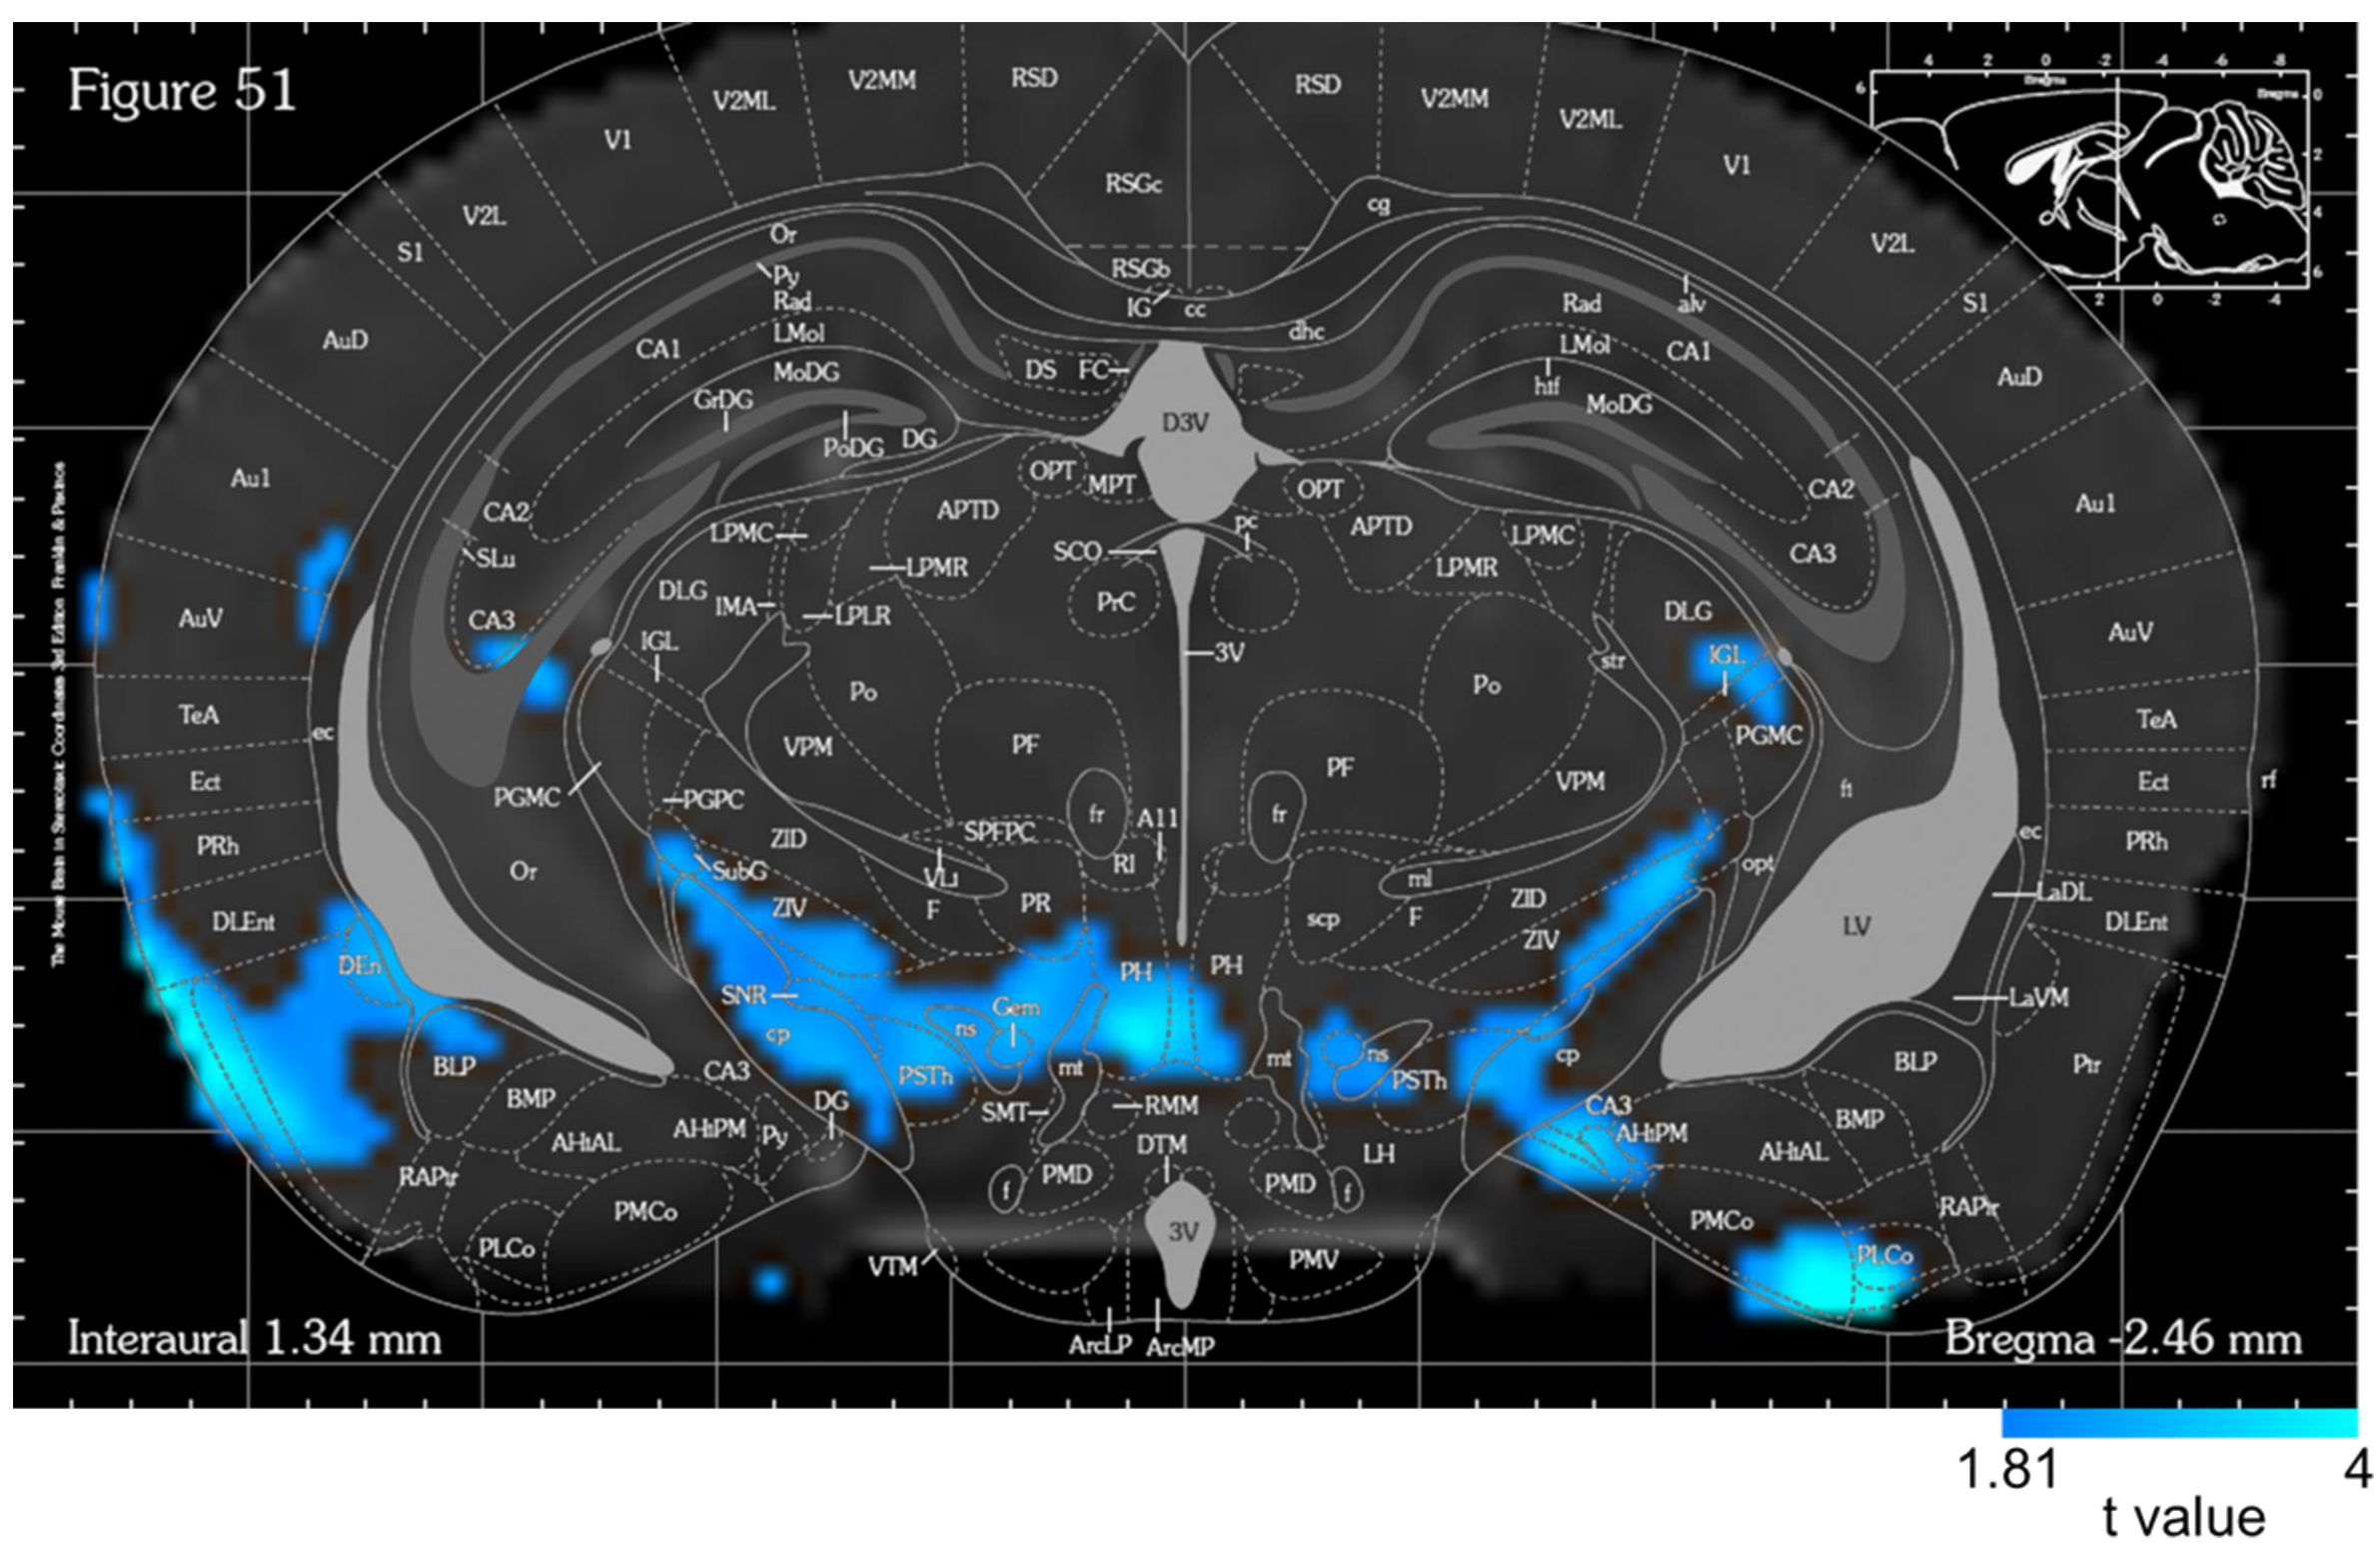



Figure S1\_8A

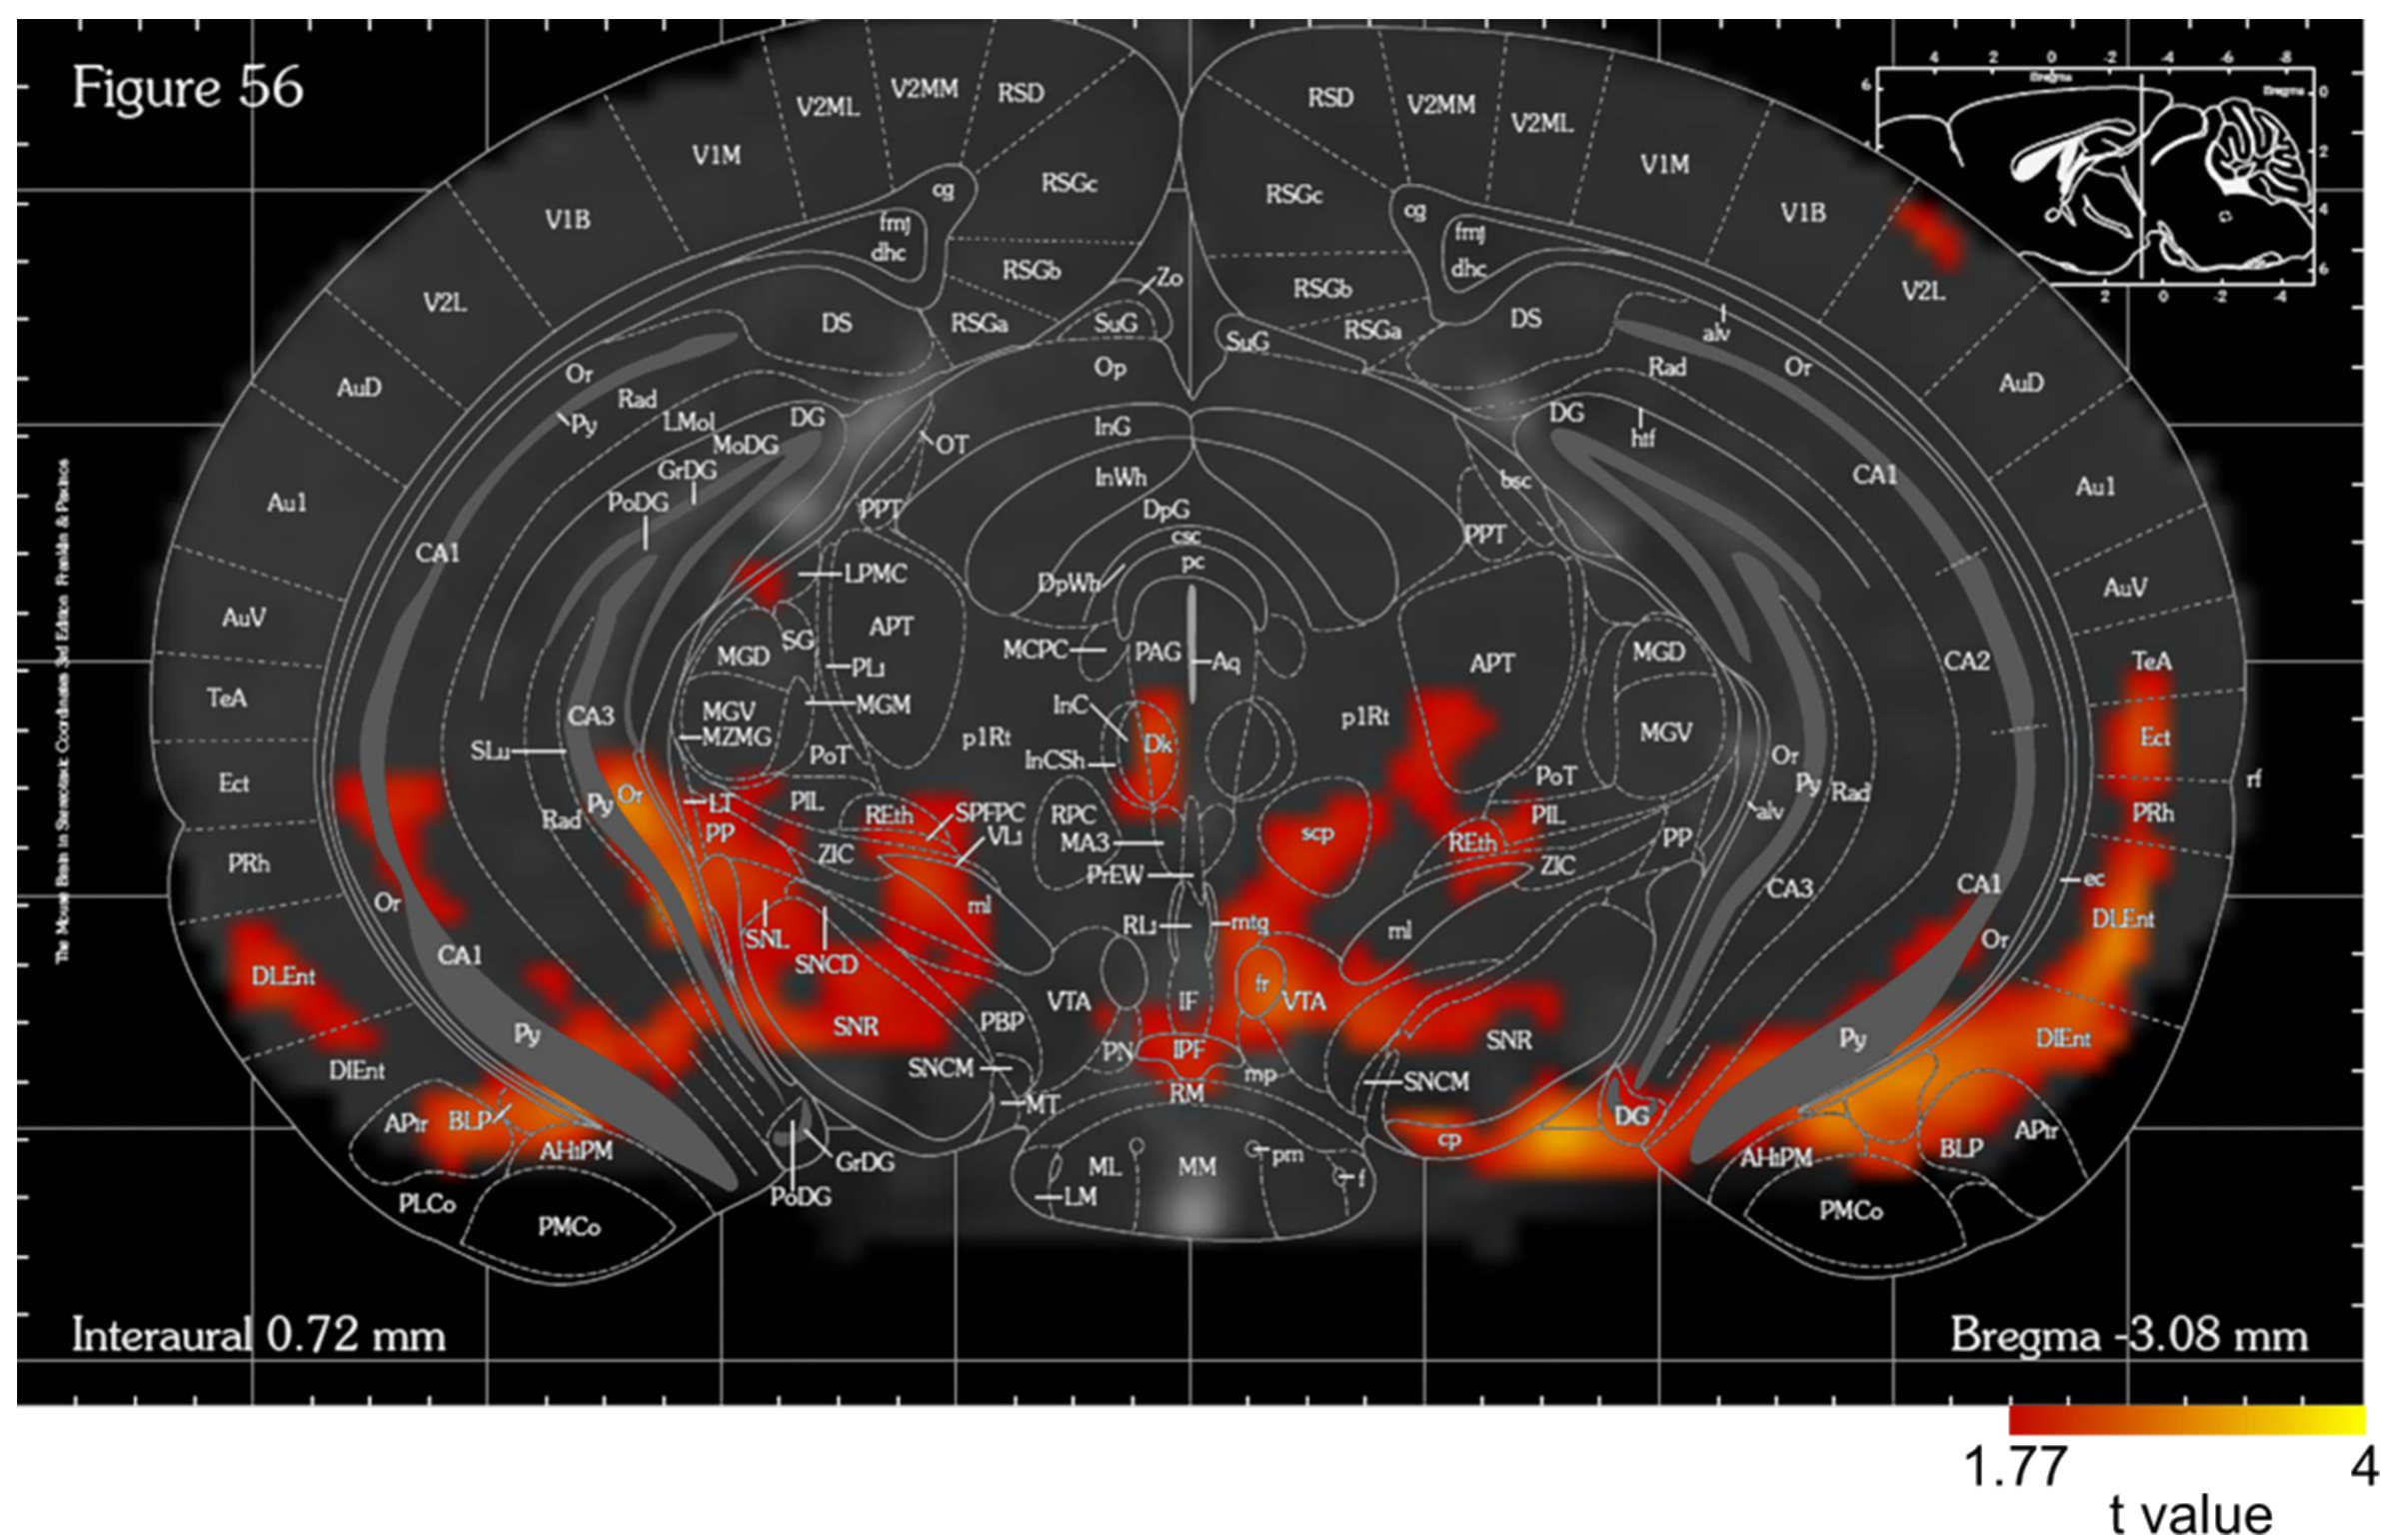

# Figure S1\_8B

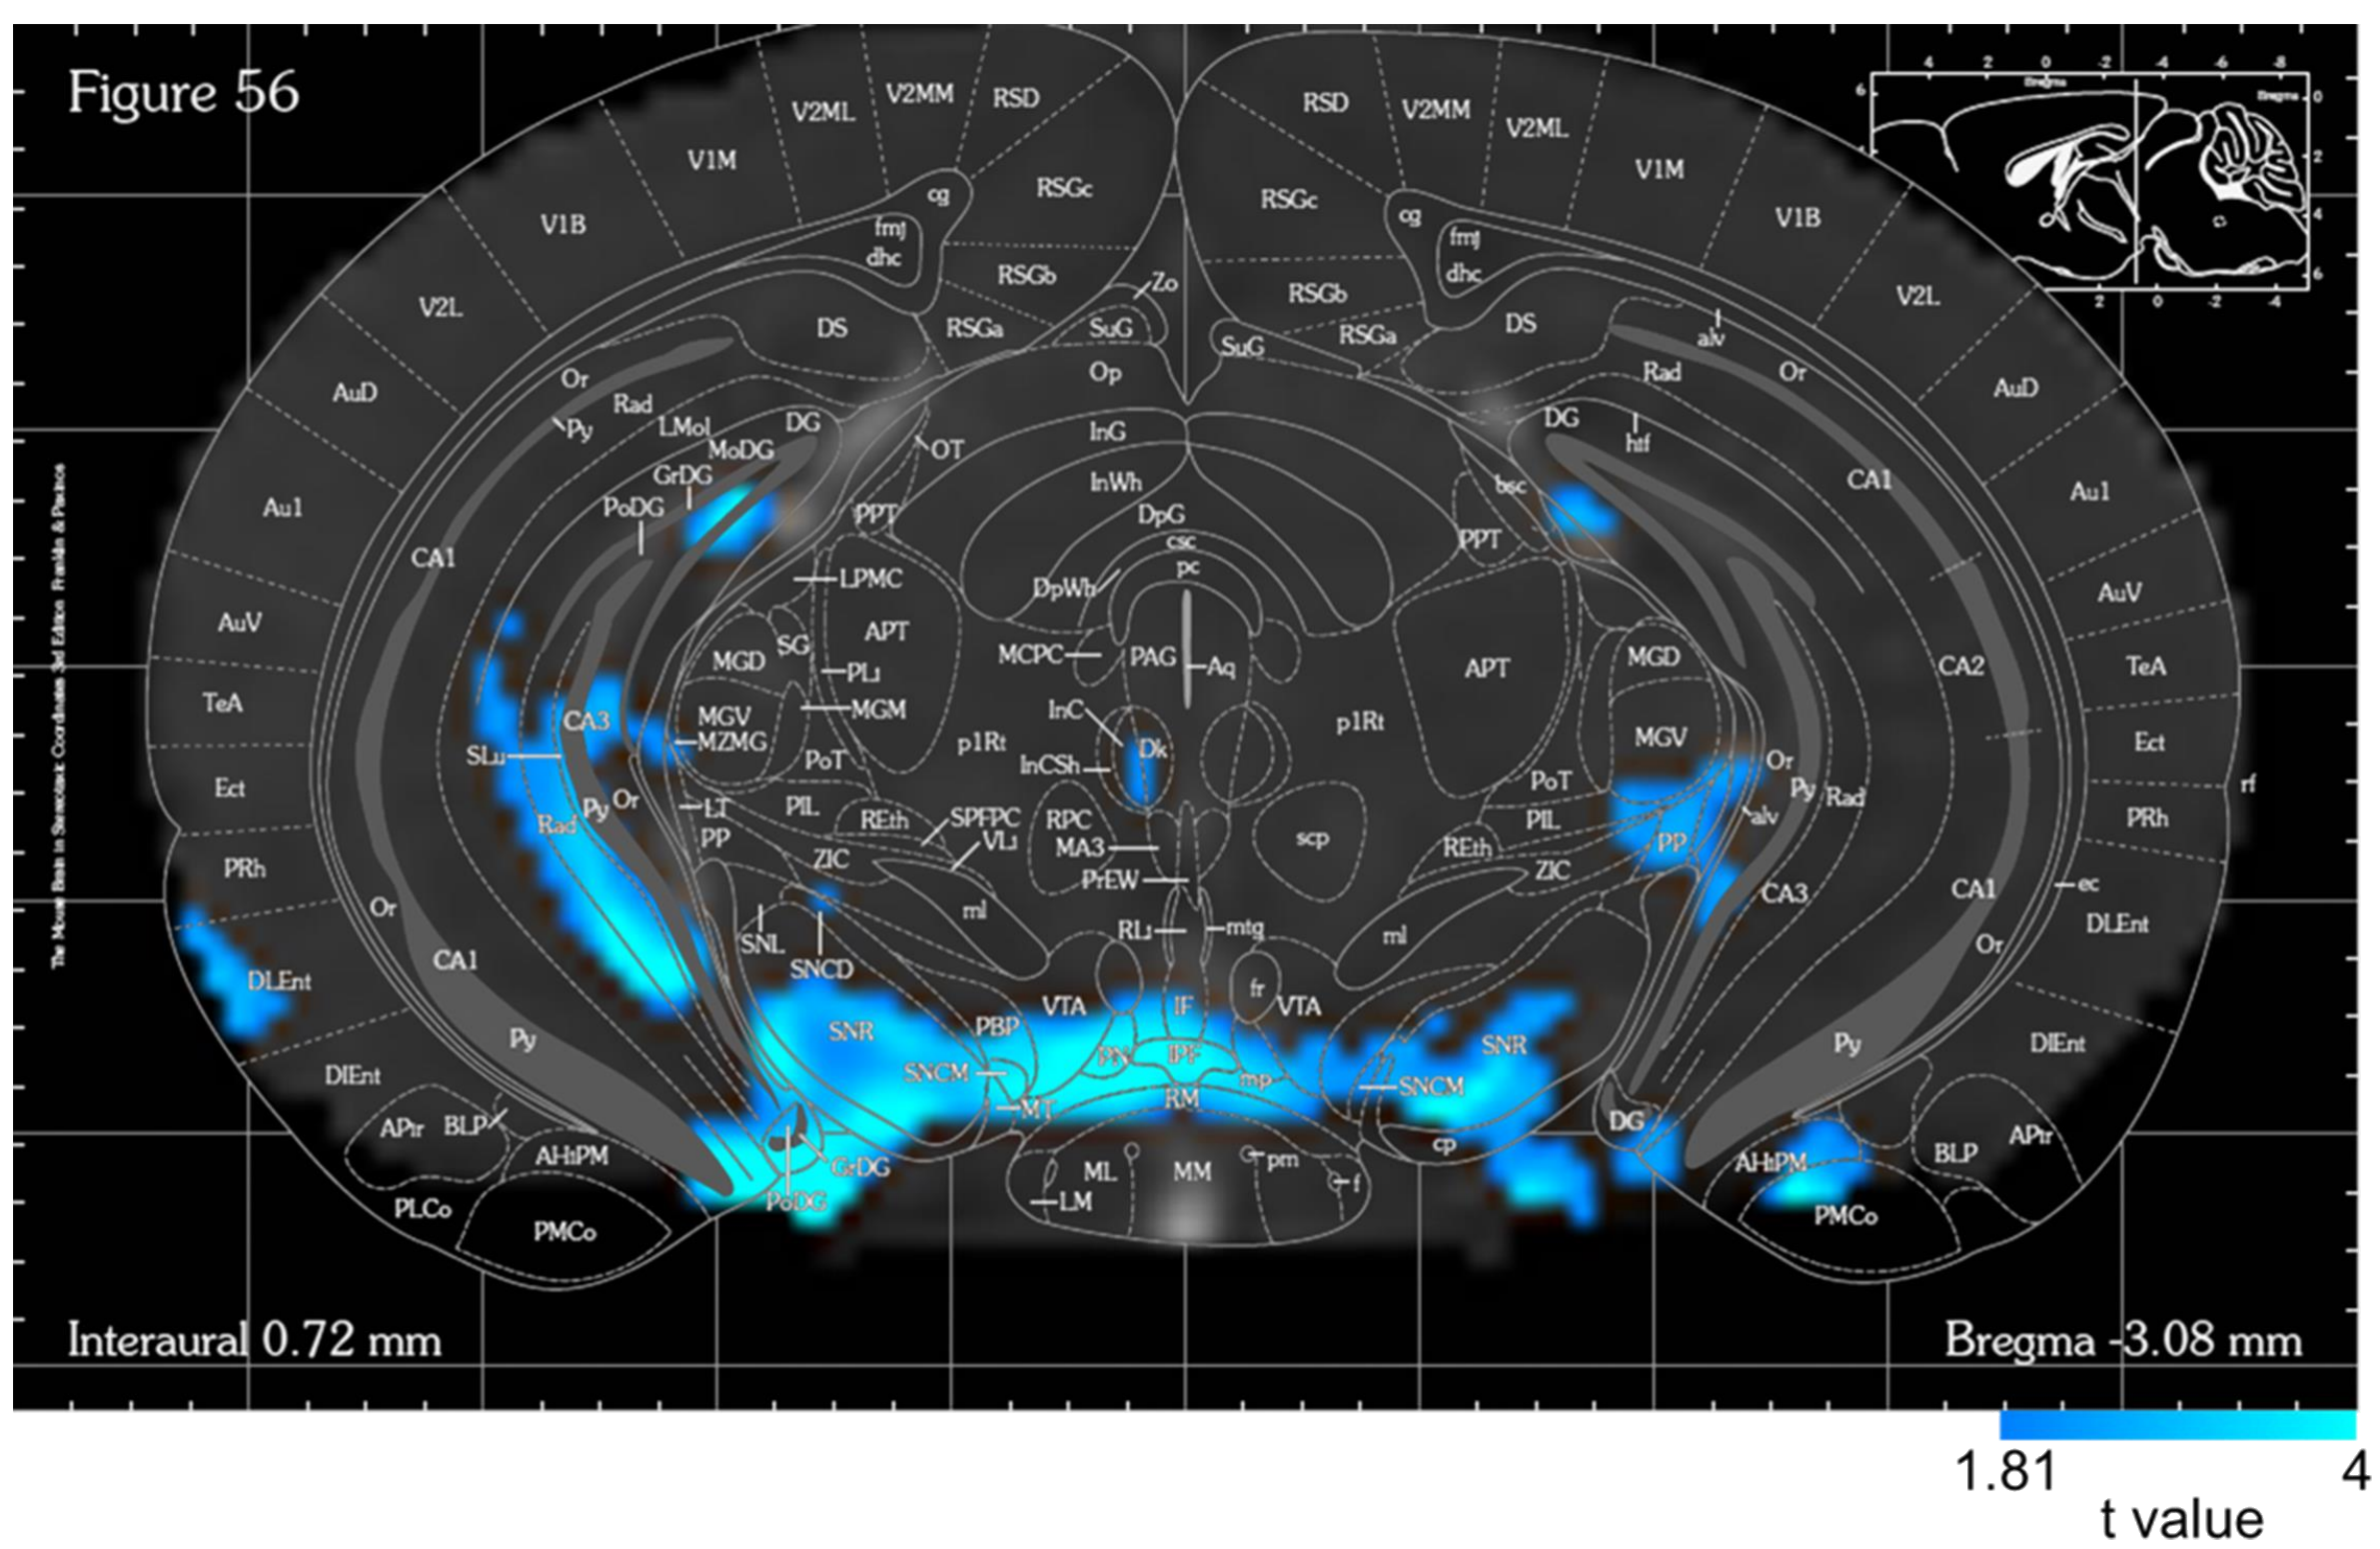



## *Supplementary Material*

### **1 Supplementary Figures**

**Supplementary Figure 1.** Merged images of the T-value plots and Franklin and Paxinos mouse brain atlas. T value is overlaid to the normalized brain template and corresponding Franklin and Paxinos mouse brain atlas (Franklin and Paxinos, 2008). S1\_1A (bregma 1.54), S1\_2A (bregma 0.74), S1\_3A (bregma -0.34), S1\_4A (bregma -0.94), S1\_5A (bregma -1.58), S1\_6A (bregma -1.94), S1\_7A (bregma -2.46), S1\_8A (bregma -3.08) are typical images showing the signal increase in [6 h Formalin] compared to [2 h Formalin]. S1\_1B (bregma 1.54), S1\_2B (bregma 0.74), S1\_3B (bregma -0.34), S1\_4B (bregma -0.94), S1\_5B (bregma -1.58), S1\_6B (bregma -1.94), S1\_7B (bregma -2.46), S1\_8B (bregma -3.08) are typical images showing the signal decrease in [hM4D] compared to [EGFP]. [The drawings and schema in this figure are partially taken from the atlas by Franklin KBJ & Paxinos G (2008), used with permission. These were published in “The mouse brain in stereotaxic coordinates, Third Edition (compact version)”, Franklin KBJ & Paxinos G, Copyright Elsevier (2008).]
